# Supplementary material for: Stereoselective Pharmacokinetics of Ketamine Administered at Low Dose in Awake Dogs
Source: Preprints.org preprint supplement (doi:10.20944/preprints202312.1150.v1), 2023-12-15

## Appendix A. Development of the pharmacokinetic models (Monolix®)

The main steps of the model selection workflow are presented here with the results. Several intermediate steps and additional model calculations, which did not lead to model improvement, are not presented here to reduce the amount of information presented. Also, Plots of concentration time course were observed as well as residual distributions but are not fully reported here.

In this appendix, the original parameters (names) are presented as generated by Monolix®. To compare to the article, use the following equivalence:

| Name in the Appendix | Name in the article / Tables |
|----------------------|------------------------------|
| V1                   | $V_{(S/R)-1}$                |
| Cl                   | $Cl_{(S/R)e}$                |
| Q                    | $Cl_{(S/R)-12}$              |
| V2                   | $V_{(S/R)-2}$                |
| Clm                  | $Cl_{(S/R)-1N}$              |
| Kpm                  | $Cl_{(S/R)Ne}$               |

### Inhalt

|                                                      |    |
|------------------------------------------------------|----|
| 1. Modelling for S-Ketamine:.....                    | 2  |
| 1.1. Noncompartmental analysis (NCA): .....          | 2  |
| 1.2. Individual compartmental analysis:.....         | 3  |
| 1.3. Population compartmental analysis .....         | 6  |
| 2. Modelling for S-Ketamine and S-Norketamine:.....  | 12 |
| 2.1. Individual compartmental analysis:.....         | 12 |
| 2.2. Population compartmental analysis:.....         | 13 |
| 3. Modelling for R-Ketamine: .....                   | 19 |
| 3.1. Noncompartmental analysis (NCA): .....          | 19 |
| 3.2. Individual compartmental analysis:.....         | 20 |
| 3.3. Population compartmental analysis .....         | 23 |
| 4. Modelling for R-Ketamine and R-Norketamine: ..... | 30 |
| 4.1. Individual compartmental analysis:.....         | 30 |
| 4.2. Population compartmental analysis: .....        | 31 |

## 1. Modelling for S-Ketamine:

### 1.1. Noncompartmental analysis (NCA):

Model applied: Intravascular administration, “linear up log down” method for integral of AUC calculation, 3 last points for  $\lambda_z$ , BLQ=LOQ/2.

**Table A1.1.1** Median/Mean adjusted  $R^2$  with different weighting.

| <i>Weighting</i>      | Uniform   | 1/Y       | 1/Y <sup>2</sup> |
|-----------------------|-----------|-----------|------------------|
| Median adjusted $R^2$ | 0.91/0.87 | 0.91/0.88 | 0.94/0.89        |

Conclusion: The weighting 1/Y<sup>2</sup> was retained.

**Table A1.1.2** Final NCA estimates for S-Ketamine.

|                                                               | Q1    | median | Q3    | mean  | SD    | SE    | CV (%) | GeoMean |
|---------------------------------------------------------------|-------|--------|-------|-------|-------|-------|--------|---------|
| $C_{\max}$ (mg·L <sup>-1</sup> )                              | 0.15  | 0.16   | 0.25  | 0.21  | 0.12  | 0.042 | 55.3   | 0.19    |
| $V_d$ (L·kg <sup>-1</sup> )                                   | 3.25  | 5.19   | 6.33  | 5.35  | 3.13  | 1.11  | 58.5   | 4.57    |
| CL (L·min <sup>-1</sup> ·kg <sup>-1</sup> )                   | 0.21  | 0.25   | 0.28  | 0.26  | 0.082 | 0.029 | 31.25  | 0.25    |
| $T_{1/2}$ (min)                                               | 9.09  | 11.15  | 17.87 | 14.45 | 8.84  | 3.13  | 61.17  | 12.59   |
| $k_{el}$ (min <sup>-1</sup> )                                 | 0.039 | 0.063  | 0.077 | 0.062 | 0.03  | 0.011 | 49.06  | 0.055   |
| AUC <sub>0-inf</sub> (min·mg·L <sup>-1</sup> )                | 1.79  | 2.01   | 2.36  | 2.05  | 0.55  | 0.19  | 26.68  | 1.99    |
| AUMC <sub>0-inf</sub> (min <sup>2</sup> ·mg·L <sup>-1</sup> ) | 23.78 | 31.44  | 46.29 | 36.88 | 20.76 | 7.34  | 56.28  | 32.34   |
| MRT <sub>0-inf</sub> (min)                                    | 10.19 | 14.61  | 21.67 | 17.3  | 10.01 | 3.54  | 57.84  | 15.16   |

## 1.2. Individual compartmental analysis:

Model applied: Intravenous infusion administration, no delay, mammillary 1-to-3 compartments, linear elimination, BLQ=LOQ/2.

First run with **Optimization Cost function:**  $(Y_{\text{pred}} - Y_{\text{obs}})^2 / Y_{\text{pred}}^2$

**Table A1.2.1** Diagnostic values with different compartment models.

| <i>Model</i> | 1-Comp | 2-Comp | 3-Comp |
|--------------|--------|--------|--------|
| -2LL (OFV)   | -521   | -608   | -556   |
| AIC          | -455   | -478   | -362   |
| BIC          | -464   | -498   | -394   |

**FigureA 1.2.1** Observed vs. predicted concentrations with different compartment models

### A1.2.1.a One-compartment model

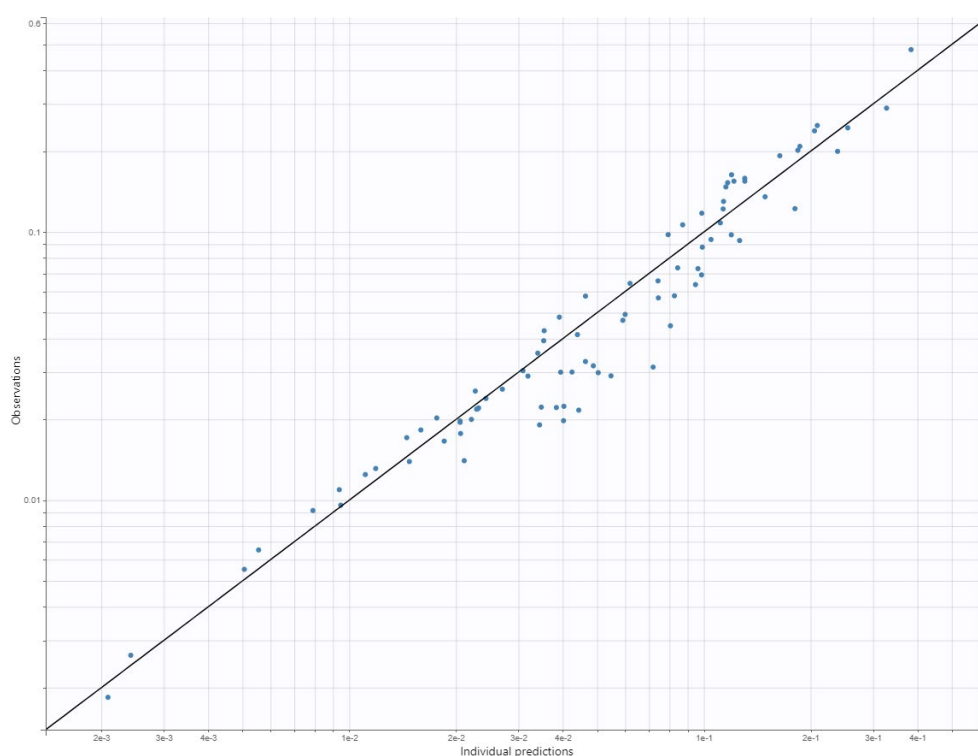

### A1.2.1.b Two-compartments model

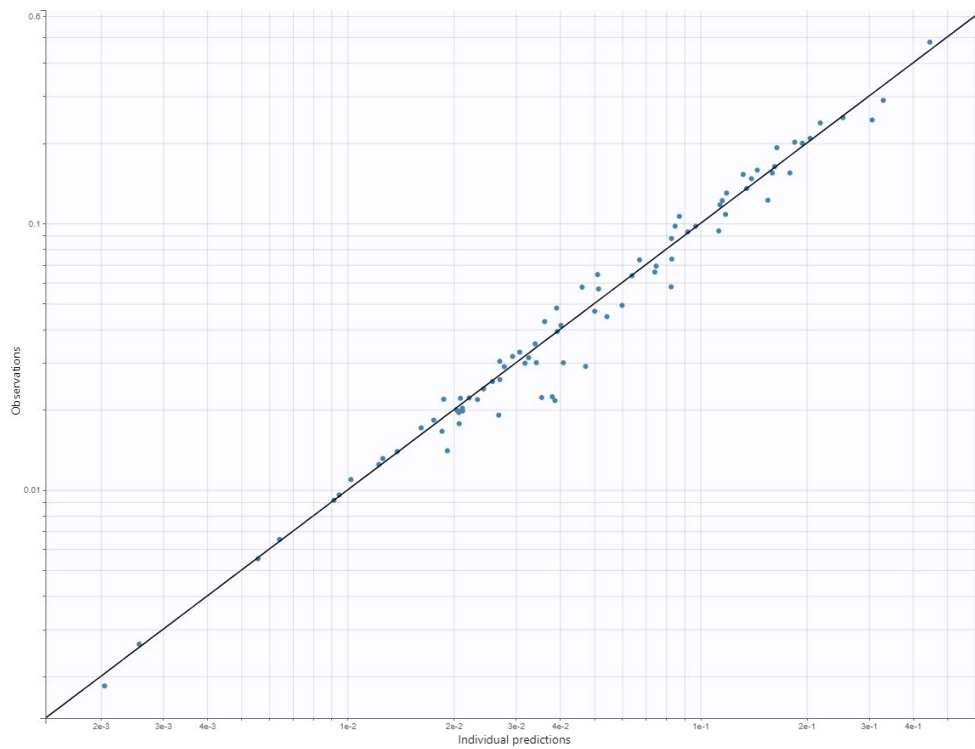

### A1.2.1.c Three-compartments model

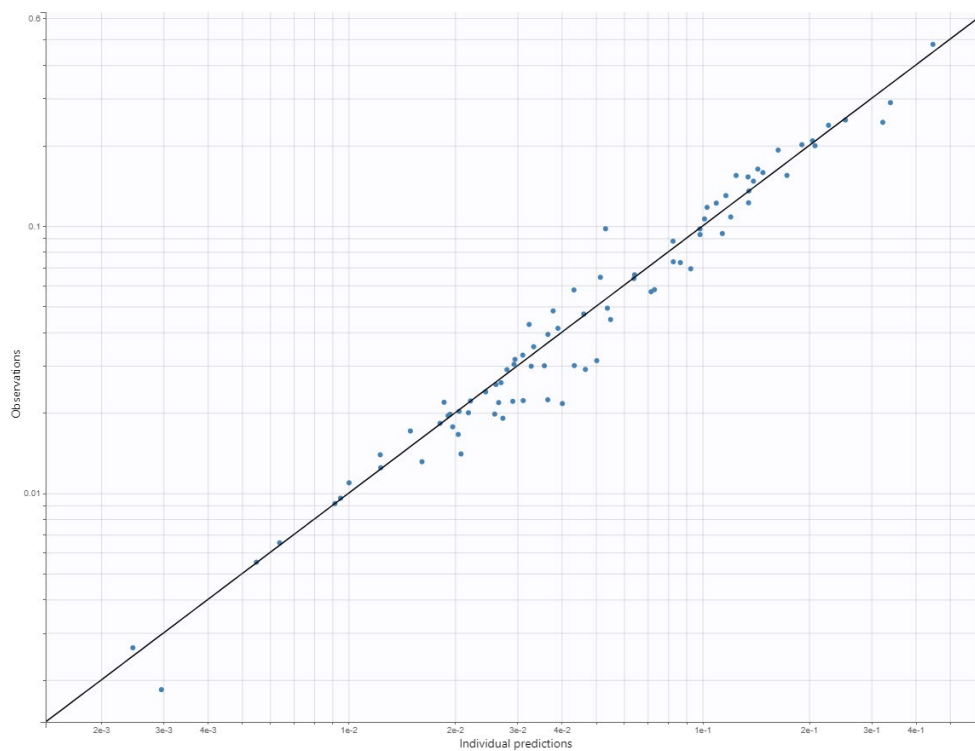

Conclusion: The two-compartments model was retained.

Definition:  $Y = (Y_{\text{pred}} - Y_{\text{obs}})$

**Table A1.2.2** Diagnostic values with different cost function used for approximation.

| Cost function | $Y^2$ | $Y^2 / Y_{\text{obs}}$ | $Y^2 / Y_{\text{pred}}$ | $Y^2 / Y_{\text{obs}}^2$ | $Y^2 / Y_{\text{pred}}^2$ | $Y^2 /  Y_{\text{pred}} \cdot Y_{\text{obs}} $ |
|---------------|-------|------------------------|-------------------------|--------------------------|---------------------------|------------------------------------------------|
| Cost          | 0.01  | 0.1                    | 0.08                    | 1.8                      | 1.76                      | 1.85                                           |
| -2LL (OFV)    | -562  | -594                   | -604                    | -610                     | -606                      | -608                                           |
| AIC           | -432  | -464                   | -474                    | -480                     | -476                      | -478                                           |
| BIC           | -452  | -484                   | -494                    | -500                     | -496                      | -498                                           |

Conclusion: The Cost function  $Y^2 / Y_{\text{obs}}^2$  is retained.

**Table A1.2.3** Confirmation of the most appropriate compartment model.

| Model      | 1-Comp | 2-Comp | 3-Comp |
|------------|--------|--------|--------|
| -2LL (OFV) | -526   | -610   | -600   |
| AIC        | -460   | -480   | -405   |
| BIC        | -468   | -500   | -437   |

Conclusion: The Two-compartmental model is further retained.

**Figure A1.2.2** Observed vs. predicted concentrations.

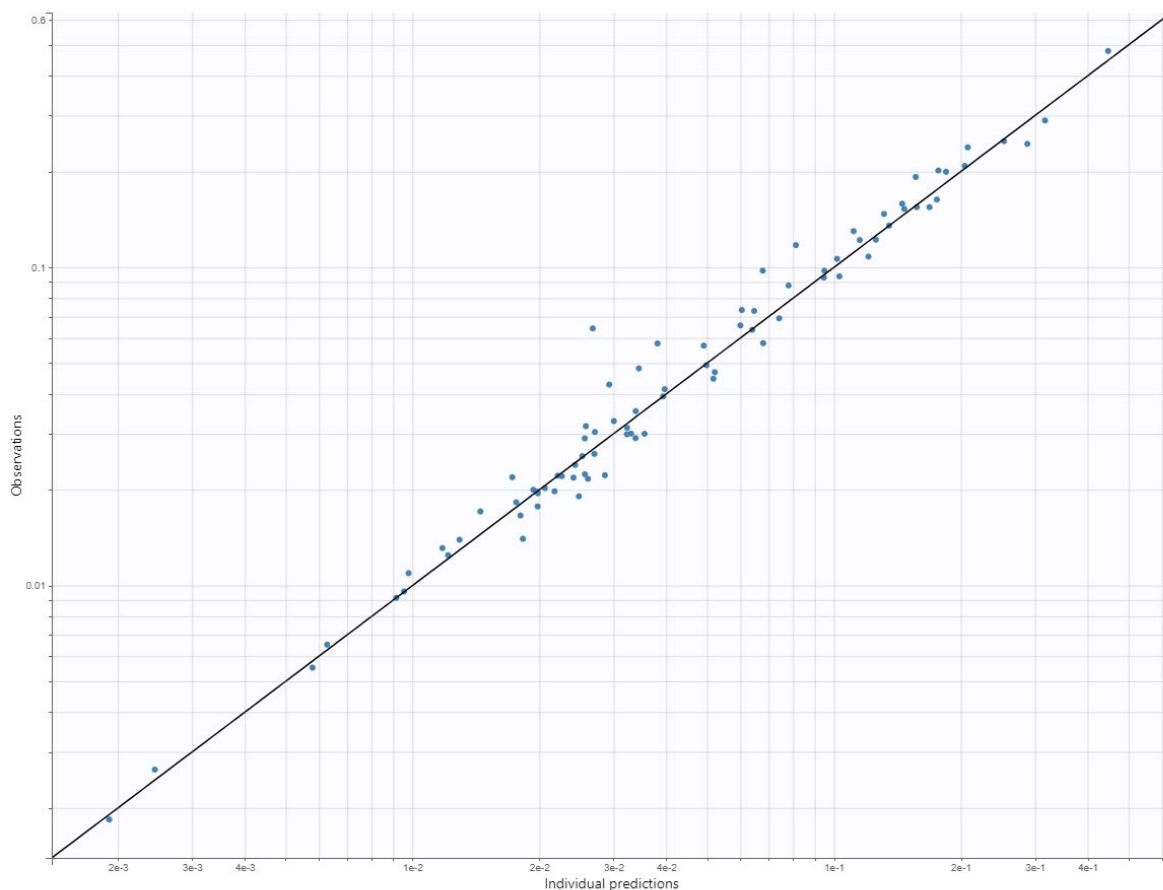

**Table A1.2.4** Final estimates of the two-compartmental model for S-Ketamine.

|                                             | Q1   | median | Q3   | mean | SD    | SE    | CV (%) | GeoMean |
|---------------------------------------------|------|--------|------|------|-------|-------|--------|---------|
| Cl (L·min <sup>-1</sup> ·kg <sup>-1</sup> ) | 0.16 | 0.2    | 0.24 | 0.21 | 0.065 | 0.016 | 31.59  | 0.2     |
| V1 (L·kg <sup>-1</sup> )                    | 0.55 | 1.27   | 1.65 | 1.3  | 1.02  | 0.25  | 78.09  | 0.93    |
| Q (L·min <sup>-1</sup> ·kg <sup>-1</sup> )  | 0.1  | 0.3    | 0.48 | 0.38 | 0.34  | 0.084 | 87.72  | 0.24    |
| V2 (L·kg <sup>-1</sup> )                    | 0.98 | 2.59   | 4.45 | 3.62 | 3.47  | 0.87  | 96.04  | 2.05    |

### 1.3. Population compartmental analysis

**Model applied:** Intravenous infusion administration, no delay, mammillary 2-compartment model, linear elimination, BLQ=LOQ/2. Concentrations are modeled with a lognormal distribution. Parameters are modeled by Stochastic Approximation Expectation-Maximization (SAEM) algorithm (Monolix®).

**Main settings:** Burn-in phase with 50 iterations. Exploratory phase with 250-5000 iterations (auto-stop criteria), stepsize exponent=0, enabled simulated annealing with a decreasing rate of 0.95. Smoothing phase with 100-1000 iterations (auto-stop criteria), stepsize exponent=0.7. Conditional mode with maximal 1000 iterations, tolerance at 0.000001. Stochastic approximation with 100-500 iterations. Monte Carlo size of 10000, with optimized degrees of freedom (1 to 15). Initial estimates are adjusted, and a final run is repeated using the last final estimates.

**Table A1.3.1** Diagnostic results with a *combined\_1* error model on predicted concentration (  $C_p = C_c + (a + b.C_c).e$  ), and a random effect for inter-individual variability (IIV).

| Cl | V1 | Q | V2 | -2LL (OFV) | AIC  | BIC  |
|----|----|---|----|------------|------|------|
| X  |    |   |    | -413       | -399 | -394 |
| X  | X  |   |    | -433       | -417 | -411 |
| X  |    | X |    | -437       | -421 | -415 |
| X  |    |   | X  | -425       | -409 | -403 |
| X  | X  | X |    | -437       | -419 | -412 |
| X  |    | X | X  | -437       | -419 | -412 |

Conclusion: An IIV random effect is included for Cl and Q.

**Table A1.3.2** Diagnostic results with a IIV random effect on Cl and Q:

| Error Model  |                                       | -2LL (OFV) | AIC  | BIC  |
|--------------|---------------------------------------|------------|------|------|
| Constant     | $C_c + a . e$                         | -434       | -420 | -415 |
| Proportional | $C_c + b . C_c . e$                   | -431       | -417 | -411 |
| Combined_1   | $C_c + (a + b . C_c) . e$             | -437       | -421 | -415 |
| Combined_2   | $C_c + \sqrt{(a^2 + (b . cC)^2)} . e$ | -438       | -422 | -416 |

**Table A1.3.3** Diagnostic results with a covariate effect (Body Weight of the individuals).

| Criteria | No covariate | Weight |
|----------|--------------|--------|
| Cl       | -2.8         | -4.1   |
| Q        | 28.5         | 30.4   |

**Table A1.3.4** Diagnostic results with a Combined\_2 error model on predicted concentration (  $C_c + \sqrt{(a^2 + (b \cdot cC)^2} \cdot e$  ) and a random effect for inter-occasion variability (IOV), including IIV for Cl and Q, as well as Covariate effect of weight on Cl.

| Cl | V1 | Q | V2 | -2LL (OFV) | AIC  | BIC  |
|----|----|---|----|------------|------|------|
|    |    |   |    | -442       | -424 | -417 |
| X  |    |   |    | -444       | -424 | -317 |
|    | X  |   |    | -441       | -421 | -413 |
|    |    | X |    | -454       | -434 | -427 |
|    |    |   | X  | -443       | -423 | -415 |
| X  |    | X |    | -458       | -436 | -428 |
|    | X  | X |    | -446       | -424 | -416 |
|    |    | X | X  | -453       | -432 | -423 |
| X  | X  | X |    | -459       | -435 | -426 |
| X  |    | X | X  | -459       | -435 | -426 |
| X  | X  | X | X  | -459       | -433 | -423 |

**Table A1.3.5** Best final estimates for the 2-compartments model for S-ketamine including IIV and IOV for Cl and Q, a Weight-covariate effect on Cl, and a combined\_2 error model.

| VALUE                                    |        | STOCH. APPROX. |           |         |
|------------------------------------------|--------|----------------|-----------|---------|
|                                          |        | S.E.           | R.S.E.(%) |         |
| Fixed Effects                            |        |                |           |         |
| Cl_pop                                   | 0.32   | 0.14           | 44.8      |         |
| beta_Cl_Weight_kg_                       | -0.056 | 0.047          | 84.1      |         |
| V1_pop                                   | 1.3    | 0.12           | 9.09      |         |
| Q_pop                                    | 0.11   | 0.042          | 37.3      |         |
| V2_pop                                   | 3.64   | 1.02           | 28.0      |         |
| Standard Deviation of the Random Effects |        |                |           |         |
|                                          | Value  | C.V.(%)        |           |         |
| omega_Cl                                 | 0.0099 | 0.99           | 0.15      | 1.50e+3 |
| omega_Q                                  | 0.21   | 21.14          | 0.76      | 365     |

|                        | VALUE |        | STOCH. APPROX. |           |
|------------------------|-------|--------|----------------|-----------|
|                        |       |        | S.E.           | R.S.E.(%) |
| gamma_Cl               | 0.23  | 23.81  | 0.057          | 24.2      |
| gamma_Q                | 1.26  | 197.64 | 0.34           | 27.0      |
| Error Model Parameters |       |        |                |           |
| a                      |       | 0.18   | 0.046          | 25.1      |
| b                      |       | 0.059  | 0.018          | 30.1      |

Due to observed correlations and several inappropriate RSE%, IIV is then removed stepwise.

**Table A1.3.6** Diagnostic values for models including different IIV contributions.

| Cl | V1 | Q | V2 | Weight | -2LL (OFV) | AIC  | BIC  | R.S.E.(%) > 50                    |
|----|----|---|----|--------|------------|------|------|-----------------------------------|
|    |    |   |    | Cl     | -458       | -440 | -434 | $\beta_{Cl\_Weight}$              |
|    |    |   |    |        | -457       | -441 | -435 |                                   |
| X  |    |   |    | Cl     | -459       | -439 | -431 | $\beta_{Cl\_Weight}, \omega_{Cl}$ |
| X  |    |   |    |        | -457       | -439 | -432 | $\omega_{Cl}$                     |
|    |    | X |    | Cl     | -458       | -438 | -431 | $\beta_{Cl\_Weight}, \omega_Q$    |
|    |    | X |    |        | -457       | -439 | -432 | $\omega_Q$                        |

**Table A1.3.7** Diagnostic results with a covariate effect (Body Weight of the individuals).

| Criteria | No covariate | Weight |
|----------|--------------|--------|
| Cl       | 4.7          | 5.3    |
| Q        | 53.8         | 56.4   |

In the final best model no IIV remains to explain parameters variability, only IOV for Cl and Q, including no covariate (Weight) effect.

**Table A1.3.8** Validation of the error model for the final model.

| Error Model  |                                              | OFV  | AIC  | BIC  | Comment             |
|--------------|----------------------------------------------|------|------|------|---------------------|
| Constant     | $Cc + a \cdot e$                             | -454 | -440 | -435 |                     |
| Proportional | $Cc + b \cdot Cc \cdot e$                    | -447 | -433 | -428 | $b_{R.S.E.} < 10\%$ |
| Combined_1   | $Cc + (a + b \cdot Cc) \cdot e$              | -457 | -441 | -434 | $b_{R.S.E.} > 50\%$ |
| Combined_2   | $Cc + \sqrt{(a^2 + (b \cdot cC)^2)} \cdot e$ | -457 | -441 | -435 |                     |



**Table A1.3.9** Shapiro Wilk tests for normal distribution of random effects for the final model.

|        | STATISTICS | P-VALUE |
|--------|------------|---------|
| eta_Cl | 0.96       | 6.87e-1 |
| eta_Q  | 0.96       | 9.18e-1 |

**Table A1.3.10** Shapiro Wilk tests for normal distribution of individual parameters for the final model.

|    | DISTRIBUTION | STATISTICS | P-VALUE |
|----|--------------|------------|---------|
| Cl | lognormal    | 0.96       | 6.87e-1 |
| Q  | lognormal    | 0.96       | 9.18e-1 |

**Table A1.3.11** Shapiro Wilk tests for normal distribution of residuals for the final model.

|       | STATISTICS | P-VALUE |
|-------|------------|---------|
| IWRES | 0.98       | 5.43e-2 |
| PWRES | 0.99       | 8.57e-1 |
| NPDE  | 0.99       | 5.73e-1 |

**Table A1.3.12** Symmetry test around 0 for residuals for the final model

|       | STATISTICS | P-VALUE |
|-------|------------|---------|
| IWRES | 1.18       | 2.39e-1 |
| PWRES | -0.13      | 8.94e-1 |
| NPDE  | 0.47       | 6.39e-1 |

The model does not detect correlations between random effects, which may improve the model.

**Table A1.3.13** Best final estimates of the pharmacokinetic parameters of S-Ketamine with the final model including no IIV, no covariate effect (weight), and IOV for CL and Q.

| VALUE                                    |       | STOCH. APPROX. |           |      |
|------------------------------------------|-------|----------------|-----------|------|
|                                          |       | S.E.           | R.S.E.(%) |      |
| Fixed Effects                            |       |                |           |      |
| Cl_pop                                   | 0.19  | 0.018          | 9.56      |      |
| V1_pop                                   | 1.32  | 0.12           | 8.80      |      |
| Q_pop                                    | 0.11  | 0.042          | 37.1      |      |
| V2_pop                                   | 3.9   | 1.16           | 29.8      |      |
| Standard Deviation of the Random Effects |       |                |           |      |
|                                          | Value | C.V.(%)        |           |      |
| gamma_Cl                                 | 0.25  | 25.36          | 0.06      | 24.0 |
| gamma_Q                                  | 1.29  | 206.94         | 0.34      | 26.0 |
| Error Model Parameters                   |       |                |           |      |
| a                                        | 0.18  | 0.045          | 24.7      |      |
| b                                        | 0.059 | 0.017          | 28.5      |      |

**Figure A1.3.1** Observed vs. predicted concentrations for S-Ketamine.

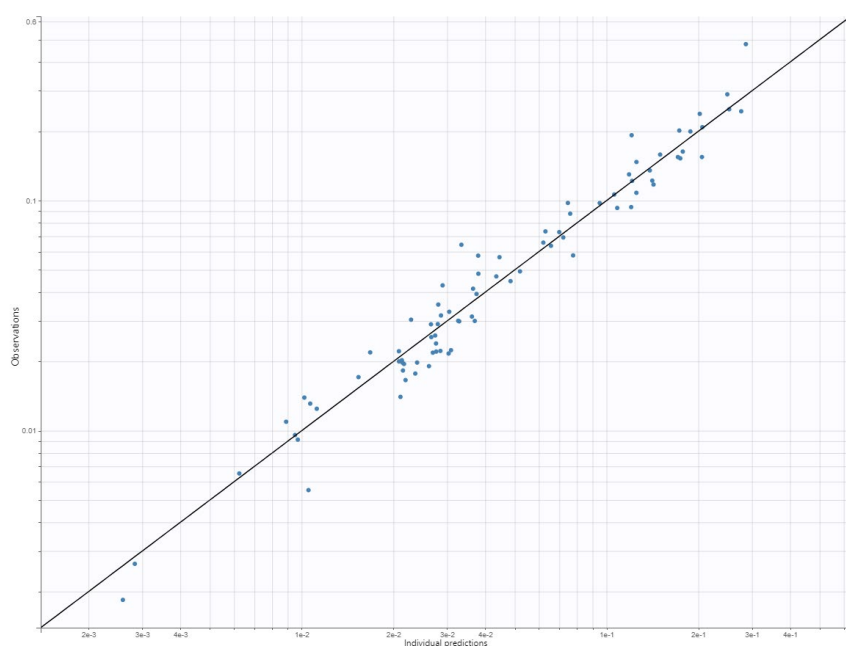

**Figure A1.3.2** Distribution of the residuals.

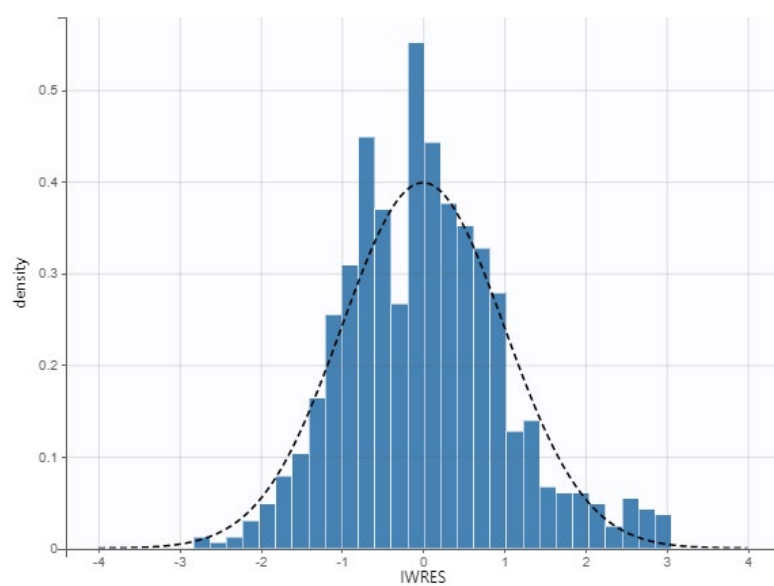

**Figure A1.3.3** Visual predictive check of the final model.

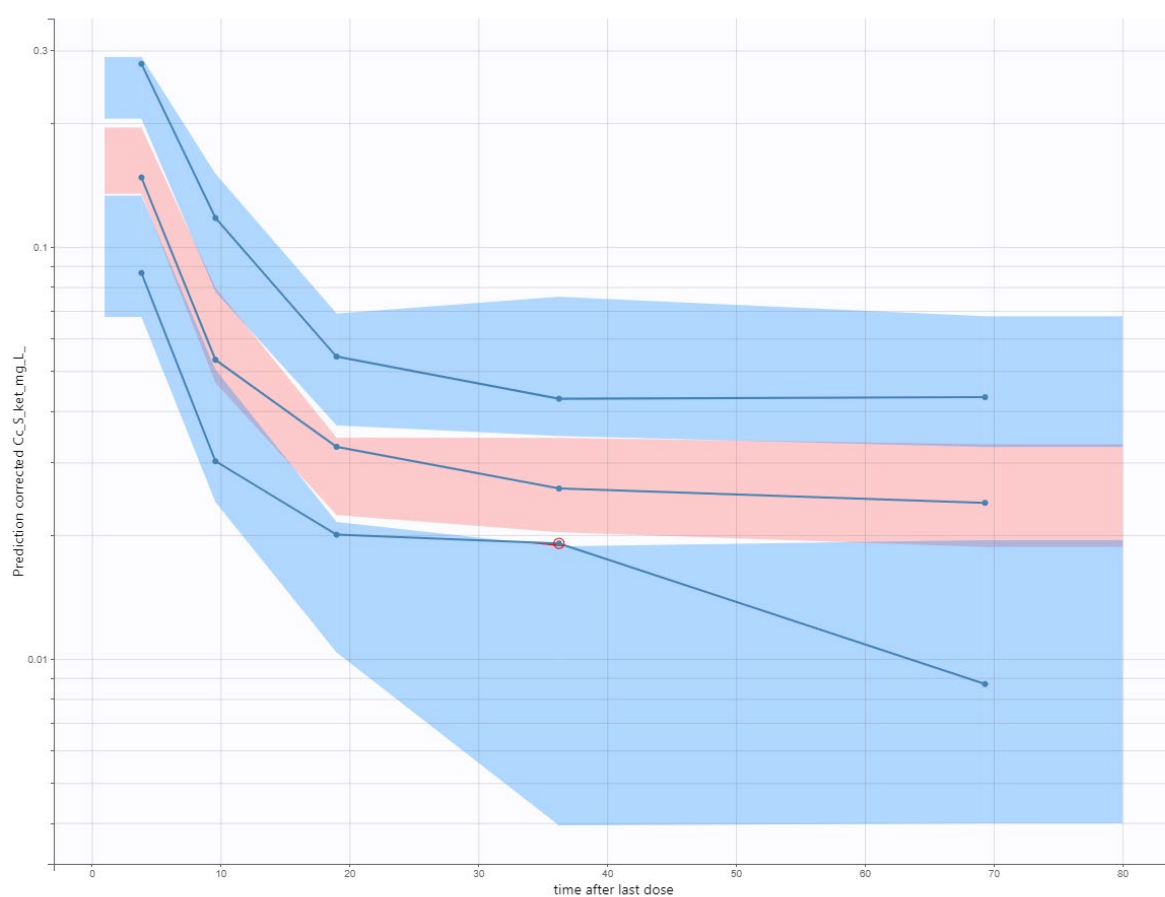

## 2. Modelling for S-Ketamine and S-Norketamine:

### 2.1. Individual compartmental analysis:

Model applied: Intravenous infusion administration, no delay, no first pass effect, unidirectional Parent-metabolite conversion, mammillary 2 compartments model with linear elimination for S-Ketamine (Parent), Linear elimination for S-Norketamine, BLQ=LOQ/2.

First run with **Optimization Cost function:**  $(Y_{\text{pred}} - Y_{\text{obs}})^2 / Y_{\text{pred}}^2$

**Table A2.1.1** Diagnostic values with different compartment models.

| <i>Model</i> | Metabolite from Parent Comp 1 |               |               | Metabolite from Parent Comp 2 |               |
|--------------|-------------------------------|---------------|---------------|-------------------------------|---------------|
|              | <b>1-Comp</b>                 | <b>2-Comp</b> | <b>3-Comp</b> | <b>1-Comp</b>                 | <b>2-Comp</b> |
| -2LL (OFV)   | -1130                         | -1146         | -1120         | -1084                         | -1065         |
| AIC          | -936                          | -888          | -798          | -890                          | -807          |
| BIC          | -900                          | -842          | -741          | -854                          | -761          |

Conclusion: The One-compartment-metabolite model issued from the first Parent-compartment was retained.

Definition:  $Y = (Y_{\text{pred}} - Y_{\text{obs}})$

**Table A2.1.2** Total cost and diagnostic values with different cost functions.

| <i>Cost function</i> | $Y^2$ | $Y^2 / Y_{\text{obs}}$ | $Y^2 / Y_{\text{pred}}$ | $Y^2 / Y_{\text{obs}}^2$ | $Y^2 / Y_{\text{pred}}^2$ | $Y^2 /  Y_{\text{pred}} \cdot Y_{\text{obs}} $ |
|----------------------|-------|------------------------|-------------------------|--------------------------|---------------------------|------------------------------------------------|
| Cost                 | 0.02  | 0.26                   | 0.24                    | 7.34                     | 4.78                      | 7.16                                           |
| -2LL (OFV)           | -1080 | -1156                  | -1164                   | -1151                    | -1205                     | -1155                                          |
| AIC                  | -886  | -962                   | -970                    | -957                     | -1011                     | -961                                           |
| BIC                  | -851  | -926                   | -935                    | -922                     | -976                      | -925                                           |

Conclusion: The Cost function  $Y^2 / Y_{\text{pred}}^2$  is retained.

**Table A2.1.3** Confirmation of the best compartment model for S-Norketamine.

| <i>Model</i> | <b>1-Comp</b> | <b>2-Comp</b> | <b>3-Comp</b> |
|--------------|---------------|---------------|---------------|
| -2LL (OFV)   | -1216         | -1195         | -1191         |
| AIC          | -1022         | -937          | -869          |
| BIC          | -986          | -891          | -812          |

Conclusion: The One-compartmental model is further retained.

**Figure A2.1.1** Observed vs. predicted concentrations with the final model (Two-compartment for S-Ketamine, One compartment issued from the central parent compartment for S-Norketamine).

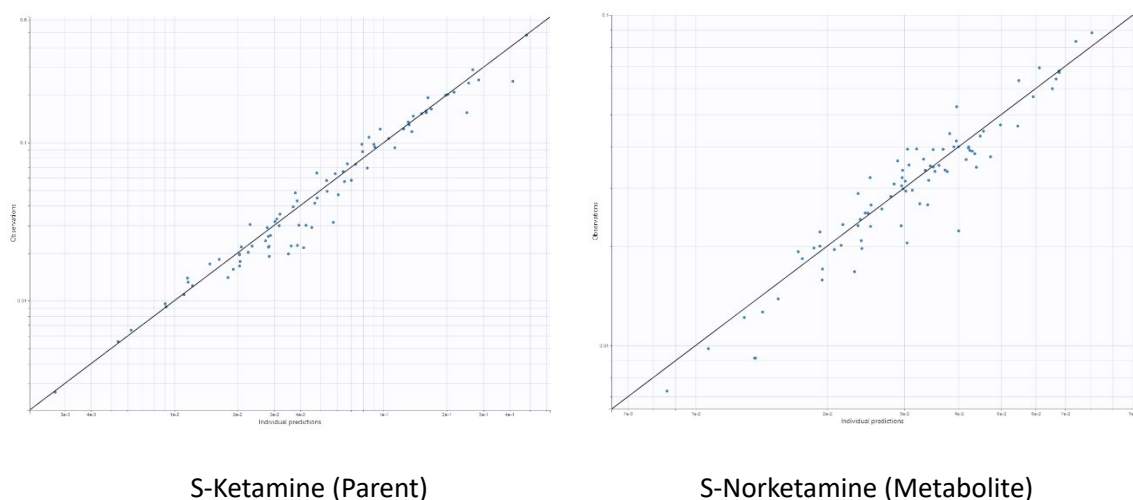

**Table A2.1.4** Best final estimates of the Parent-Metabolite model: Standard mammillary 2- Compartments model for S-Ketamine (Parent), and a standard mammillary 1-Compartment model for S-Norketamine (Metabolite), issued from the first Parent compartment.

|     | Q1      | median | Q3    | mean  | SD    | SE     | CV (%) | GeoMean |
|-----|---------|--------|-------|-------|-------|--------|--------|---------|
| V1  | 0.026   | 0.34   | 0.87  | 0.46  | 0.4   | 0.1    | 87.26  | 0.17    |
| Cl  | 0.089   | 0.12   | 0.17  | 0.13  | 0.061 | 0.015  | 48.02  | 0.11    |
| Q   | 0.039   | 0.22   | 0.32  | 0.25  | 0.26  | 0.066  | 107.01 | 0.11    |
| V2  | 0.28    | 1.19   | 1.85  | 1.47  | 1.42  | 0.35   | 96.52  | 0.58    |
| Clm | 0.00065 | 0.018  | 0.047 | 0.028 | 0.028 | 0.007  | 98.26  | 0.0071  |
| Kpm | 0.014   | 0.041  | 0.069 | 0.045 | 0.034 | 0.0085 | 75.04  | 0.028   |

## 2.2. Population compartmental analysis:

**Model applied:** Intravenous infusion administration, no delay, no first pass effect, Parent-Metabolite mammillary compartments model, Parent (S-Ketamine) is modeled as a 2-compartment model, linear elimination, Metabolite (S-Norketamine) ) is modeled as a 1-compartment model issued from the main parent compartment, linear elimination. BLQ=LOQ/2. Concentrations are modeled with a lognormal distribution. Parameters are modeled by Stochastic Approximation Expectation-Maximization (SAEM) algorithm (Monolix©).

**Main settings:** Burn-in phase with 50 iterations. Exploratory phase with 250-5000 iterations (auto-stop criteria), stepsize exponent=0, enabled simulated annealing with a decreasing rate of 0.95. Smoothing phase with 100-1000 iterations (auto-stop criteria) ), stepsize exponent=0.7. Conditional mode with maximal 1000 iterations, tolerance at 0.000001. Stochastic approximation with 100-500 iterations. Monte Carlo size of 10000, with optimized degrees of freedom (1 to 15). Initial estimates are adjusted, and a final run is repeated using the last final estimates.

**Table A2.2.1** Diagnostic results with a combined\_1 error model on predicted concentration (  $C_p = C_c + (a + b.C_c).e$  ) for both parent and metabolite concentrations. Based on the preliminary results, the model includes first IOV for Cl and Q for the parent model.

| IIV |     | IOV |     |            |      |      |
|-----|-----|-----|-----|------------|------|------|
| Clm | Kpm | Clm | Kpm | -2LL (OFV) | AIC  | BIC  |
|     |     |     |     | -963       | -939 | -930 |
| X   |     |     |     | -965       | -939 | -929 |
|     | X   |     |     | -972       | -946 | -936 |
|     | X   |     | X   | -1000      | -972 | -961 |
|     | X   | X   |     | -980       | -952 | -942 |
|     |     |     | X   | -1000      | -974 | -964 |

Conclusion: The model with IOV on Kpm is retained

**Table A2.2.2** Diagnostic results with different error models (OFV / AIC / BIC, all values are negatives).

| Parent/Metabolite | Constant    | Proportional | Combined_1   | Combined_2   |
|-------------------|-------------|--------------|--------------|--------------|
| Constant          | 998/976/967 | 1000/978/970 | 1000/976/967 | 1000/976/967 |
| Proportional      | 987/965/957 | 989/967/958  | 988/964/955  | 989/965/955  |
| Combined_1        | 998/974/965 | 1000/976/967 | 1001/975/965 | 1000/974/964 |
| Combined_2        | 998/974/965 | 1001/977/967 | 1001/975/965 | 1001/975/965 |

**Table A2.2.3** Diagnostic values to compare the use of Covariate Body weight (kg) on the model parameters (OFV / AIC / BIC, all values are negatives).

|     | -            | Q            | Kpm          |
|-----|--------------|--------------|--------------|
| -   | 1000/978/970 |              |              |
| Cl  | 1004/980/971 | 1005/979/969 | 1005/979/969 |
| Q   | 1000/976/967 |              |              |
| Kpm | 1000/976/967 |              |              |

The model detects a **correlation between IOV random effects for Cl and Q.**

| -2LL (OFV) | AIC  | BIC  |
|------------|------|------|
| -1012      | -986 | -976 |

**Final model equations:**

$$\log(V1) = \log(V1\_pop)$$

$$\log(Cl) = \log(Cl\_pop) + \beta_{Cl\_Weight} * Weight + \gamma_{Cl}$$

$$\log(Q) = \log(Q\_pop) + \gamma_Q$$

$$\log(V2) = \log(V2\_pop)$$

$$\log(Cl_m) = \log(Cl\_pop)$$

$$\log(Kpm) = \log(Kpm\_pop) + \gamma_{Kpm}$$

**Table A2.2.4** Best estimates for the Parent-metabolite model for S-Ketamine and S-Norketamine with Constant and Proportional error models on S-Ketamine (Parent) and S-Norketamine (metabolite), respectively, no IIV, IOV on Cl, Q, and Kpm, and a covariate effect of Weight on Cl, and a correlation between IOV random effects for Cl and Q.

|                                          |  | VALUE |         | STOCH. APPROX. |           |
|------------------------------------------|--|-------|---------|----------------|-----------|
|                                          |  |       |         | S.E.           | R.S.E.(%) |
| Fixed Effects                            |  |       |         |                |           |
| V1_pop                                   |  | 1.05  | 0.12    | 11.5           |           |
| Cl_pop                                   |  | 0.42  | 0.23    | 53.7           |           |
| beta_Cl_Weight_kg_                       |  | -0.13 | 0.061   | 45.8           |           |
| Q_pop                                    |  | 0.18  | 0.05    | 27.6           |           |
| V2_pop                                   |  | 2.82  | 0.36    | 12.9           |           |
| Clm_pop                                  |  | 0.079 | 0.014   | 17.6           |           |
| Kpm_pop                                  |  | 0.062 | 0.0078  | 12.6           |           |
| Standard Deviation of the Random Effects |  |       |         |                |           |
|                                          |  | Value | C.V.(%) |                |           |
| gamma_Cl                                 |  | 0.4   | 41.82   | 0.098          | 24.4      |
| gamma_Q                                  |  | 0.88  | 108.84  | 0.22           | 24.5      |
| gamma_Kpm                                |  | 0.36  | 36.82   | 0.074          | 20.6      |
| Correlations                             |  |       |         |                |           |
| corr2_Q_Cl                               |  | 0.77  | 0.16    | 21.2           |           |
| Error Model Parameters                   |  |       |         |                |           |
| a1                                       |  | 0.26  | 0.025   | 9.64           |           |
| b2                                       |  | 0.066 | 0.006   | 9.17           |           |

**Figure A2.2.1** Observed versus predicted concentrations of S-Ketamine.

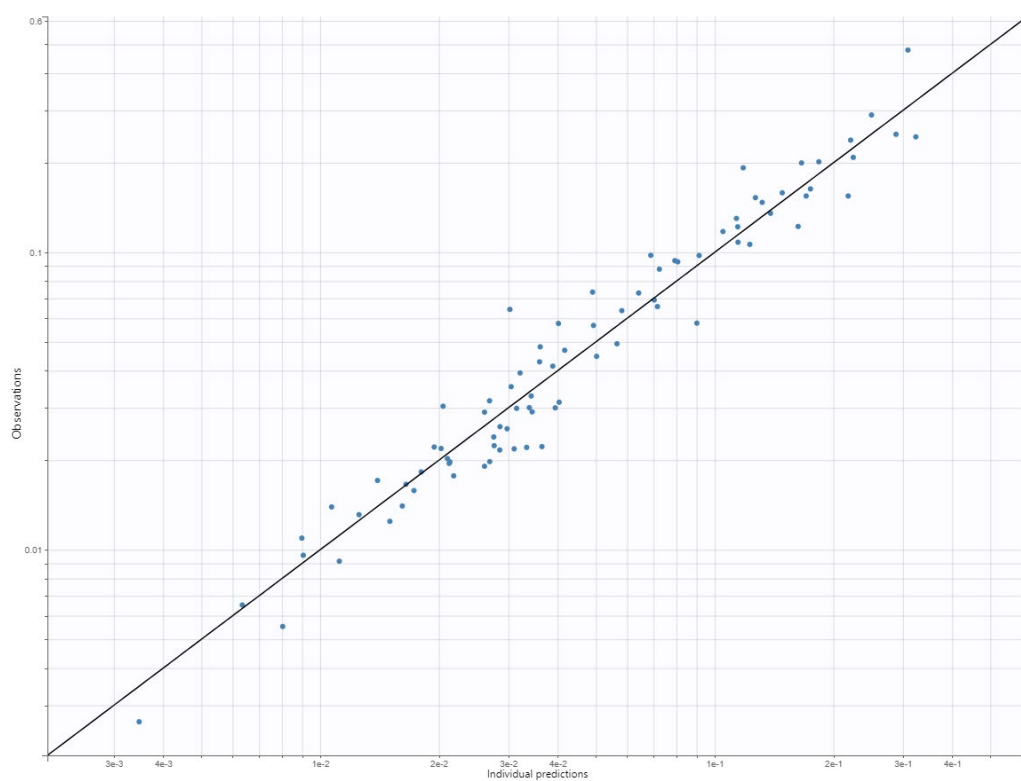

**Figure A2.2.2** Residual distribution for S-Ketamine.

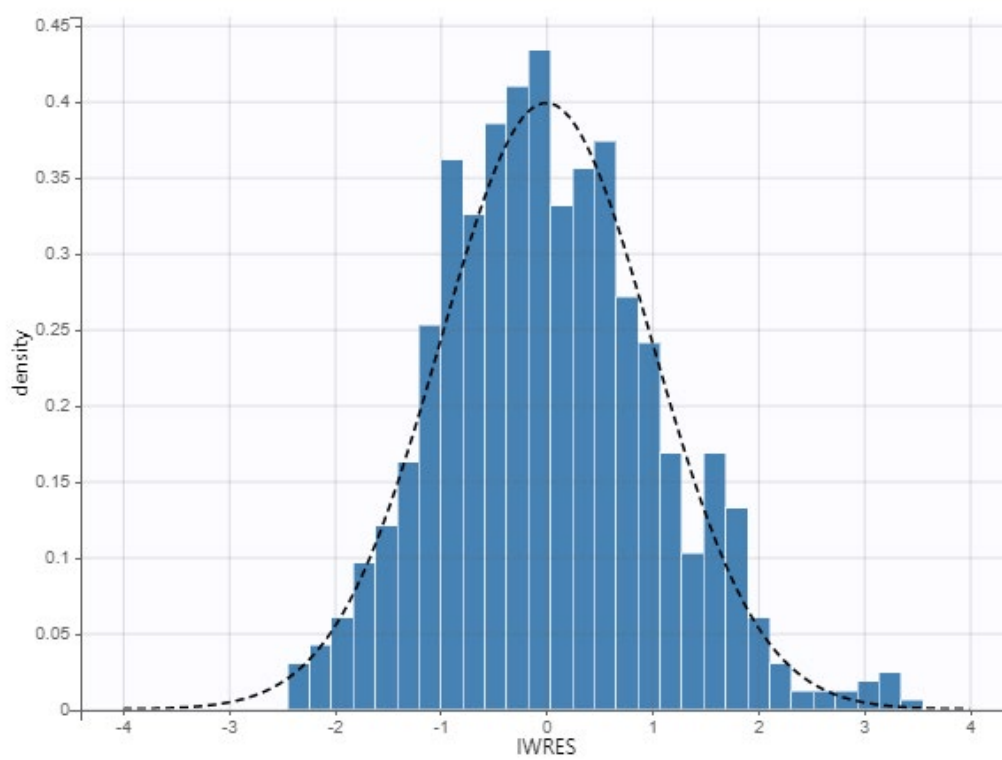



**Figure A2.2.3** Visual predictive check for S-Ketamine.

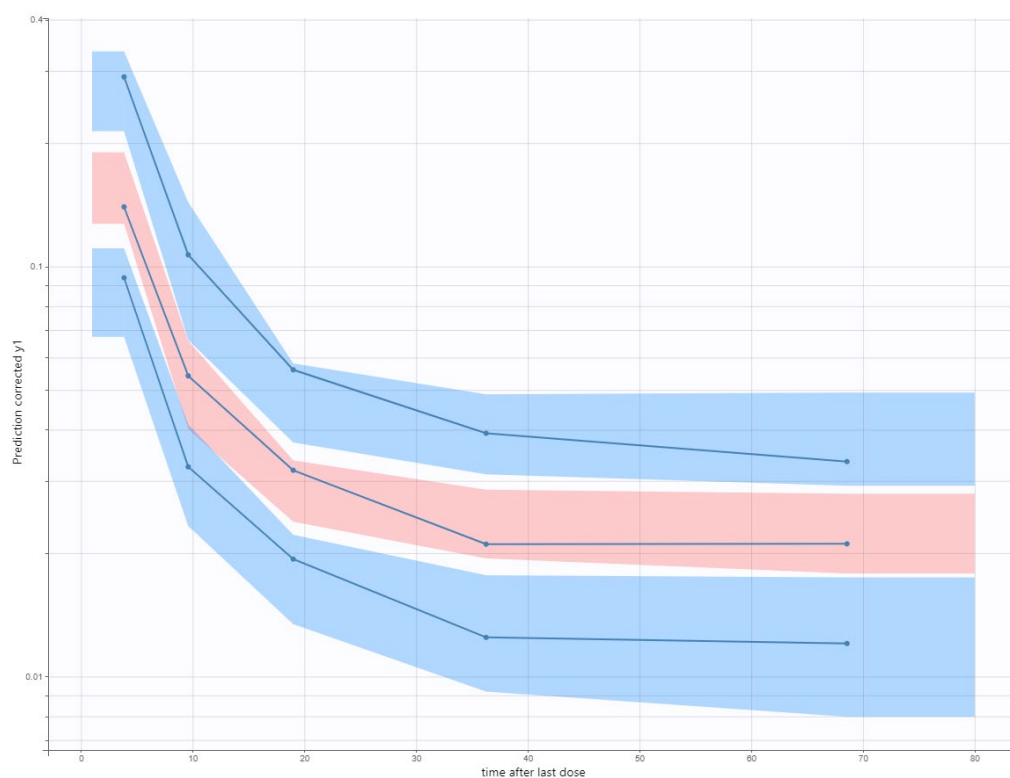

**Figure A2.2.4** Observed versus predicted concentrations of S-Norketamine.

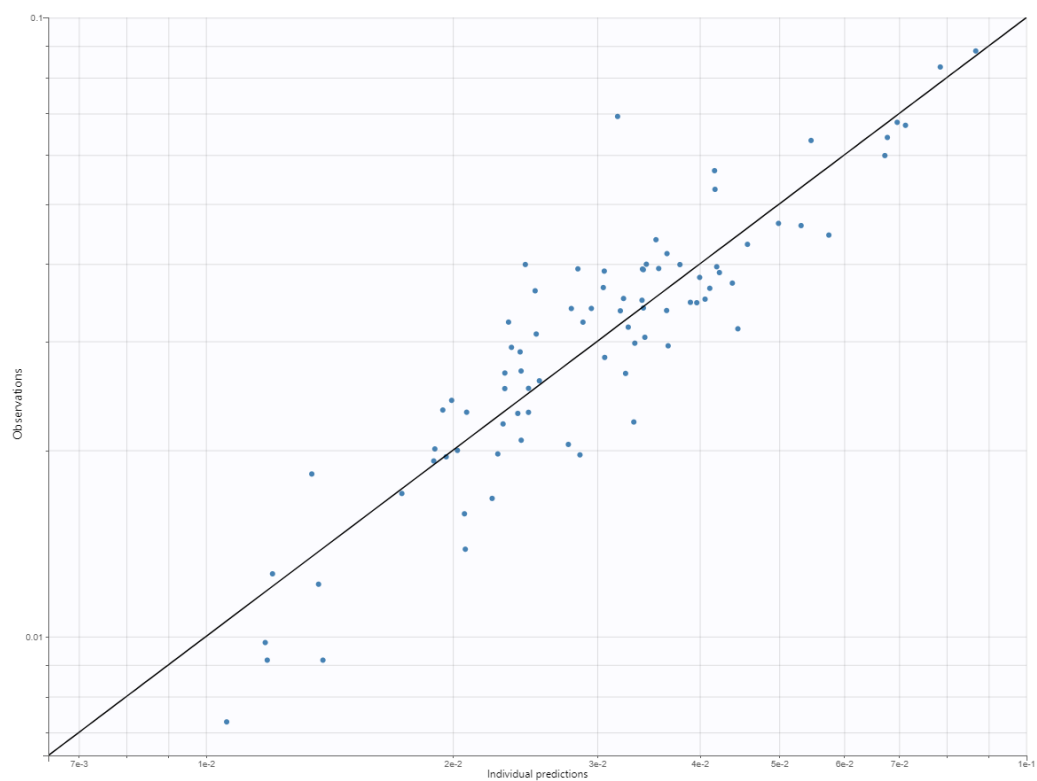

**Figure A2.2.5** Residual distribution for S-Norketamine

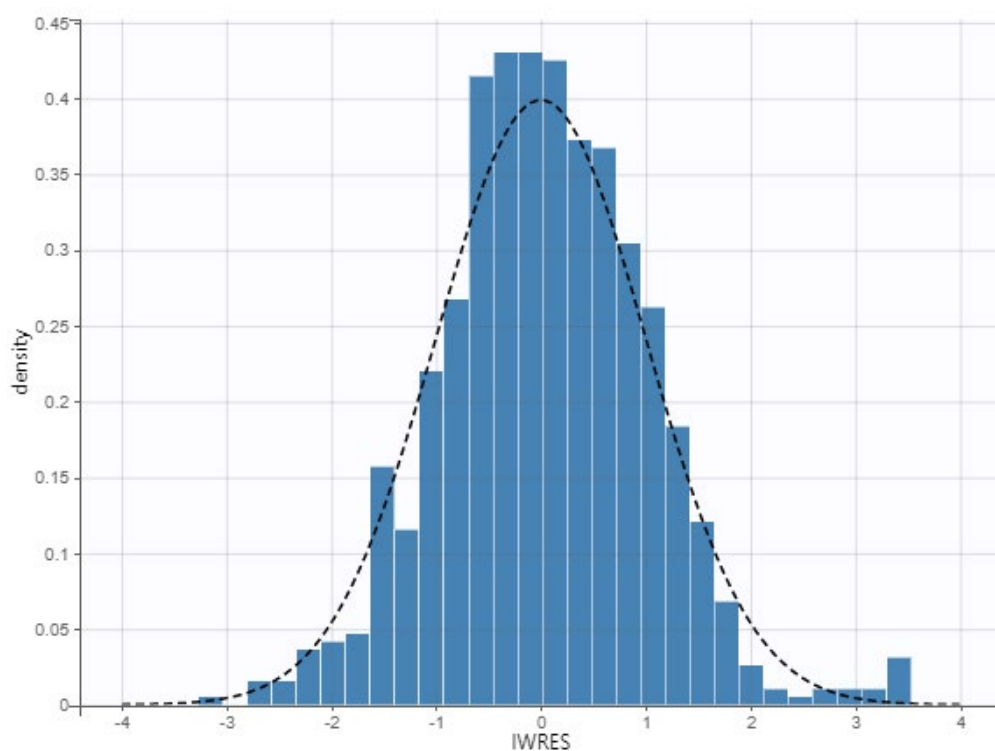

**Figure A2.2.6** Visual predictive check for S-Norketamine.

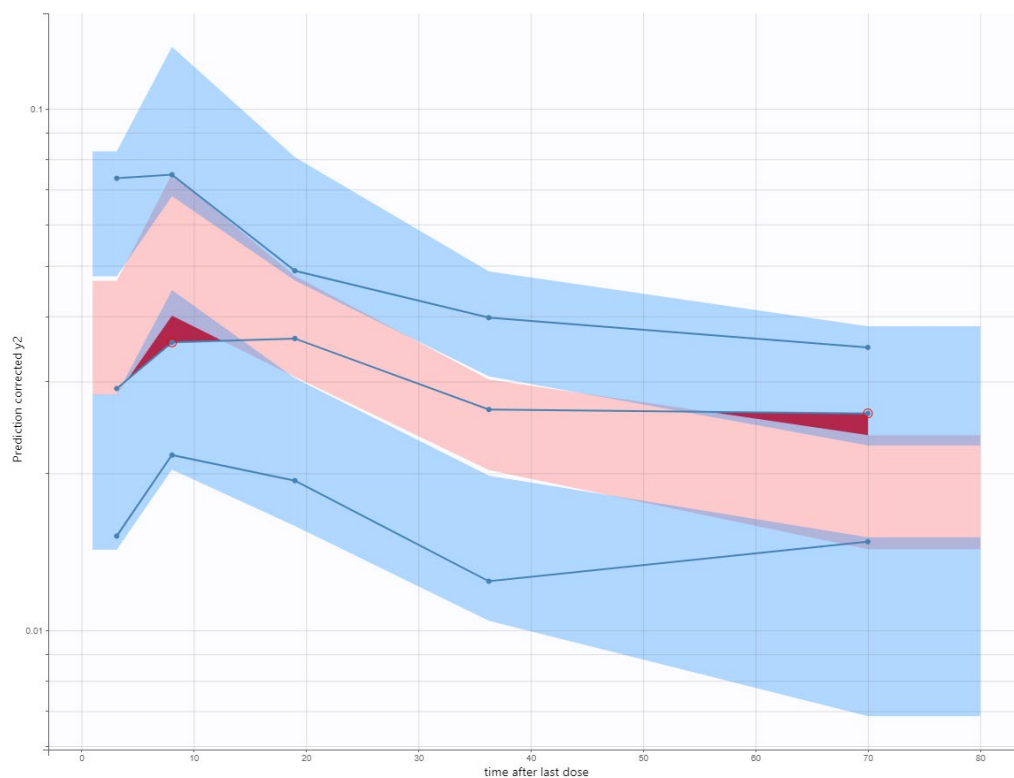

### 3. Modelling for R-Ketamine:

#### 3.1. Noncompartmental analysis (NCA):

Model applied: Intravascular administration, “linear up log down” method for integral of AUC calculation, 3 last points for  $\lambda_z$ , BLQ=LOQ/2.

**Table A3.1.1** Mean and Median adjusted  $R^2$  with different weighting.

| Weighting             | Uniform     | 1/Y        | 1/Y <sup>2</sup> |
|-----------------------|-------------|------------|------------------|
| Median adjusted $R^2$ | 0.89 ; 0.86 | 0.9 ; 0.86 | 0.93 ; 0.86      |

Conclusion: The weighting  $1/Y^2$  was retained.

**Table A3.1.2** Final NCA estimates for R-Ketamine.

|                                                               | Q1    | median | Q3    | mean  | SD    | SE    | CV (%) | GeoMean |
|---------------------------------------------------------------|-------|--------|-------|-------|-------|-------|--------|---------|
| $C_{\max}$ (mg·L <sup>-1</sup> )                              | 0.14  | 0.15   | 0.22  | 0.19  | 0.096 | 0.034 | 50.4   | 0.17    |
| $V_d$ (L·kg <sup>-1</sup> )                                   | 3.6   | 6.23   | 7.23  | 6.17  | 3.62  | 1.28  | 58.74  | 5.25    |
| CL (L·min <sup>-1</sup> ·kg <sup>-1</sup> )                   | 0.22  | 0.24   | 0.27  | 0.26  | 0.078 | 0.028 | 29.91  | 0.25    |
| $T_{1/2}$ (min)                                               | 10.99 | 13.6   | 19.82 | 16.44 | 9.5   | 3.36  | 57.76  | 14.42   |
| $k_{el}$ (min <sup>-1</sup> )                                 | 0.035 | 0.052  | 0.063 | 0.054 | 0.03  | 0.01  | 54.41  | 0.048   |
| AUC <sub>0-inf</sub> (min·mg·L <sup>-1</sup> )                | 1.89  | 2.07   | 2.28  | 2.03  | 0.45  | 0.16  | 22.05  | 1.98    |
| AUMC <sub>0-inf</sub> (min <sup>2</sup> ·mg·L <sup>-1</sup> ) | 24.32 | 38.09  | 53.76 | 41.58 | 22.13 | 7.82  | 53.21  | 36.76   |
| MRT <sub>0-inf</sub> (min)                                    | 11.9  | 17.92  | 24.38 | 19.81 | 11.04 | 3.9   | 55.73  | 17.43   |

### 3.2. Individual compartmental analysis:

Model applied: Intravenous infusion administration, no delay, mammillary 1-to-3 compartments, linear elimination, BLQ=LOQ/2.

First run with **Optimization Cost function:**  $(Y_{\text{pred}} - Y_{\text{obs}})^2 / Y_{\text{pred}}^2$

**Table A3.2.1** Diagnostic values with different compartment models.

| <i>Model</i> | 1-Comp | 2-Comp | 3-Comp |
|--------------|--------|--------|--------|
| -2LL (OFV)   | -527   | -562   | -548   |
| AIC          | -461   | -432   | -354   |
| BIC          | -470   | -453   | -387   |

**Figure A3.2.1** Observed vs. predicted concentrations with different compartment models

#### A3.2.1.a One-compartment model

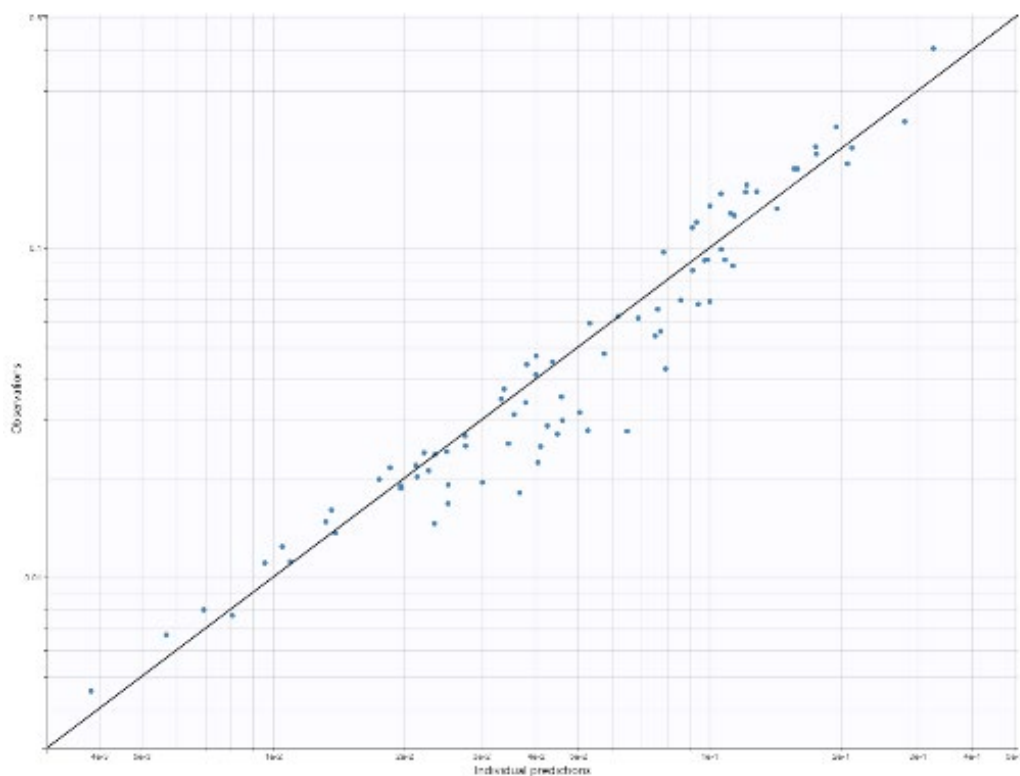

### A3.2.1.a Two-compartment model

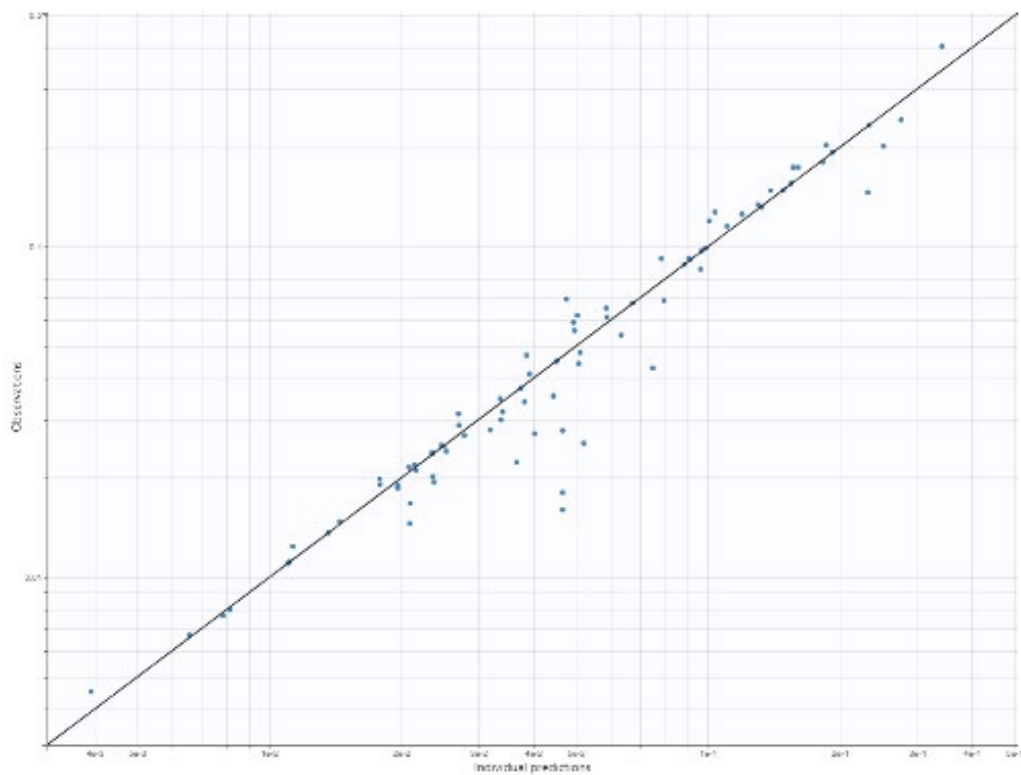

### A3.2.1.a Three-compartment model

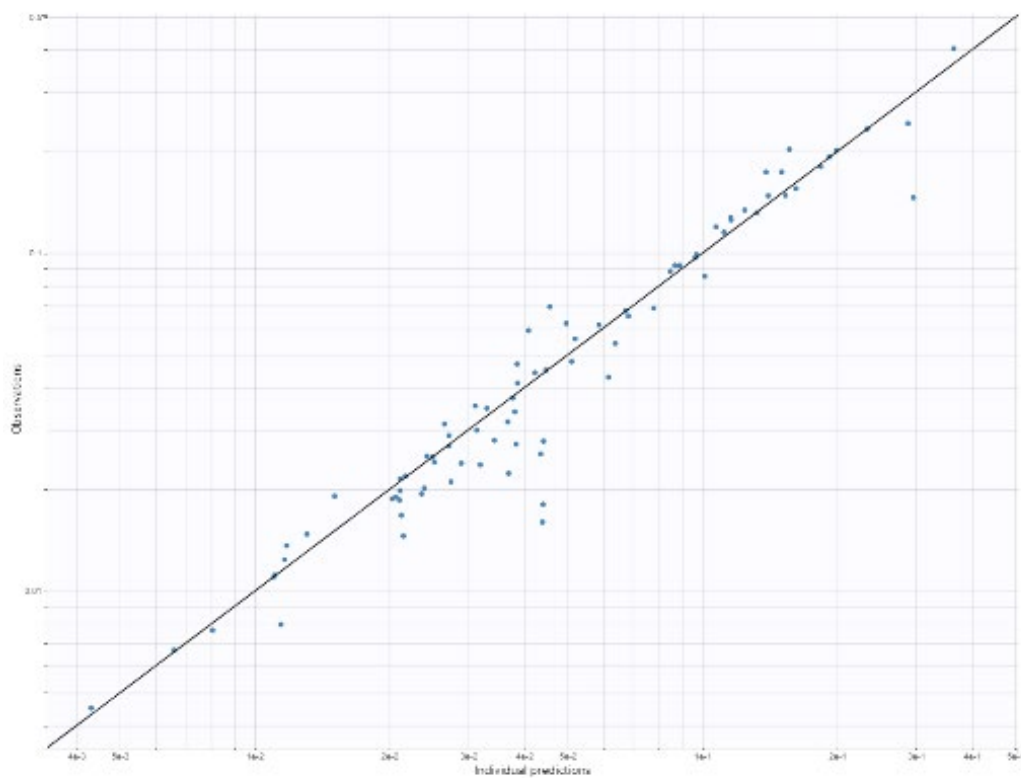

Conclusion: The two-compartment model was retained.

Definition:  $Y = (Y_{\text{pred}} - Y_{\text{obs}})$

**Table A3.2.2** Diagnostic values with different cost function used for approximation.

| Cost function | $Y^2$ | $Y^2 / Y_{\text{obs}}$ | $Y^2 / Y_{\text{pred}}$ | $Y^2 / Y_{\text{obs}}^2$ | $Y^2 / Y_{\text{pred}}^2$ | $Y^2 /  Y_{\text{pred}} \cdot Y_{\text{obs}} $ |
|---------------|-------|------------------------|-------------------------|--------------------------|---------------------------|------------------------------------------------|
| Cost          | 0.01  | 0.12                   | 0.08                    | 1.42                     | 2.59                      | 1.63                                           |
| -2LL (OFV)    | -539  | -569                   | -598                    | -621                     | -562                      | -610                                           |
| AIC           | -409  | -439                   | -468                    | -491                     | -432                      | -480                                           |
| BIC           | -430  | -460                   | -489                    | -512                     | -453                      | -501                                           |

Conclusion: The Cost function  $Y^2 / Y_{\text{obs}}^2$  is retained.

**Table A3.2.3** Confirmation of the most appropriate compartment model.

| Model      | 1-Comp | 2-Comp | 3-Comp |
|------------|--------|--------|--------|
| -2LL (OFV) | -530   | -621   | -593   |
| AIC        | -464   | -491   | -399   |
| BIC        | -473   | -512   | -431   |

Conclusion: The Two-compartmental model is further retained.

**Figure A3.2.2** Observed vs. predicted concentrations.

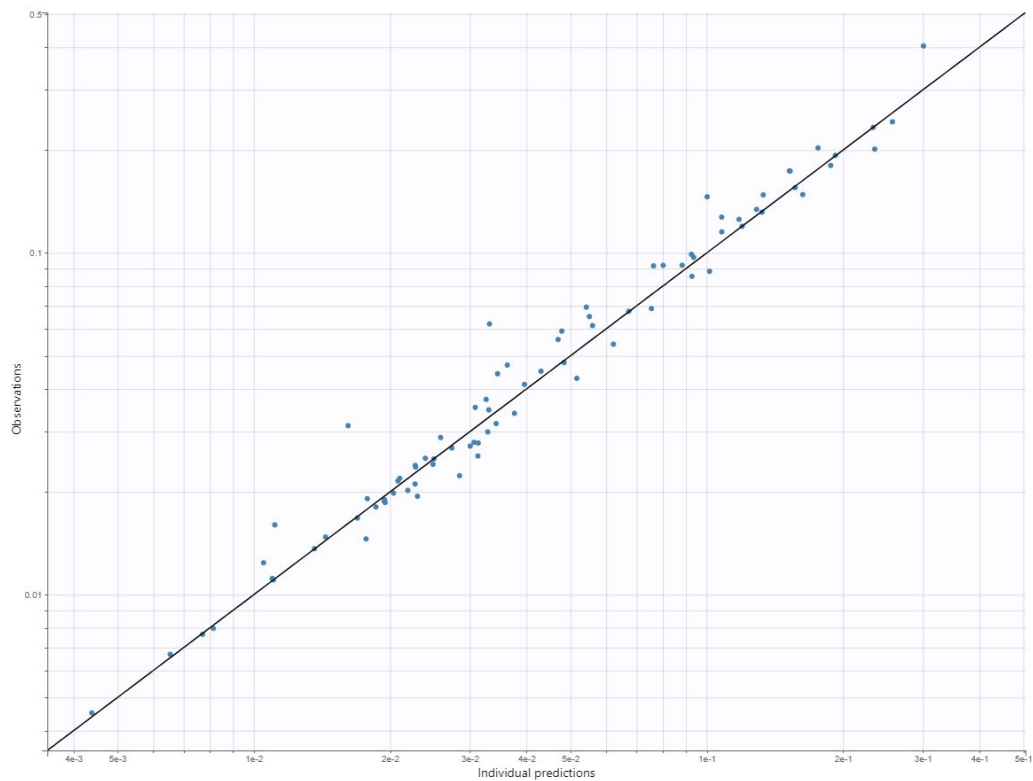

**Table A3.2.4** Final estimates of the two-compartmental model for R-Ketamine.

|                                             | Q1   | median | Q3    | mean  | SD   | SE    | CV (%) | GeoMean |
|---------------------------------------------|------|--------|-------|-------|------|-------|--------|---------|
| Cl (L·min <sup>-1</sup> ·kg <sup>-1</sup> ) | 0.12 | 0.2    | 0.22  | 0.21  | 0.18 | 0.045 | 84.25  | 0.13    |
| V1 (L·kg <sup>-1</sup> )                    | 0.7  | 1.6    | 3.13  | 2.11  | 1.87 | 0.47  | 88.73  | 1.34    |
| Q (L·min <sup>-1</sup> ·kg <sup>-1</sup> )  | 0.24 | 0.35   | 0.76  | 1.13  | 2.44 | 0.61  | 215.99 | 0.42    |
| V2 (L·kg <sup>-1</sup> )                    | 3.01 | 5.01   | 31.29 | 19.66 | 27.3 | 6.82  | 138.85 | 4.24    |

### 3.3. Population compartmental analysis

**Model applied:** Intravenous infusion administration, no delay, mammillary 2-compartment model, linear elimination, BLQ=LOQ/2. Concentrations are modeled with a lognormal distribution. Parameters are modeled by Stochastic Approximation Expectation-Maximization (SAEM) algorithm (Monolix®).

**Main settings:** Burn-in phase with 50 iterations. Exploratory phase with 250-5000 iterations (auto-stop criteria), stepsize exponent=0, enabled simulated annealing with a decreasing rate of 0.95. Smoothing phase with 100-1000 iterations (auto-stop criteria), stepsize exponent=0.7. Conditional mode with maximal 1000 iterations, tolerance at 0.000001. Stochastic approximation with 100-500 iterations. Monte Carlo size of 10000, with optimized degrees of freedom (1 to 15). Initial estimates are adjusted, and a final run is repeated using the last final estimates.

**Table A3.3.1** Diagnostic results with a *combined\_1* error model on predicted concentration (  $C_p = C_c + (a + b.C_c).e$  ), and a random effect for inter-individual variability (IIV).

| Cl | V1 | Q | V2 | -2LL (OFV) | AIC  | BIC  |
|----|----|---|----|------------|------|------|
| X  |    |   |    | -398       | -384 | -379 |
| X  | X  |   |    | -416       | -400 | -394 |
| X  |    | X |    | -412       | -396 | -390 |
| X  |    |   | X  | -406       | -390 | -384 |
| X  | X  | X |    | -416       | -398 | -391 |
| X  | X  |   | X  | -415       | -397 | -391 |

Conclusion: An IIV random effect is included for Cl and V1.

**Table A3.3.2** Diagnostic results with a IIV random effect on Cl and Q:

| Error Model  |                                       | -2LL (OFV) | AIC  | BIC  |
|--------------|---------------------------------------|------------|------|------|
| Constant     | $C_c + a . e$                         | -416       | -402 | -396 |
| Proportional | $C_c + b . C_c . e$                   | -407       | -393 | -387 |
| Combined_1   | $C_c + (a + b . C_c) . e$             | -416       | -400 | -394 |
| Combined_2   | $C_c + \sqrt{(a^2 + (b . cC)^2)} . e$ | -416       | -400 | -394 |

**Table A3.3.3** Diagnostic results with a covariate effect (Body Weight of the individuals).

| Criteria | No covariate | Weight |
|----------|--------------|--------|
| Cl       | -25          | -23    |
| V1       | 31           | 32     |

**Table A3.3.4** Diagnostic results with a Constant error model on predicted concentration (  $C_c + a \cdot e$  ) and a random effect for inter-occasion variability (IOV), including IIV for Cl and V1, without a Covariate effect (Body weight).

| Cl | V1 | Q | V2 | -2LL (OFV) | AIC  | BIC  |
|----|----|---|----|------------|------|------|
|    |    |   |    | -416       | -402 | -396 |
| X  |    |   |    | -436       | -420 | -414 |
|    | X  |   |    | -429       | -413 | -406 |
|    |    | X |    | -426       | -410 | -404 |
|    |    |   | X  | -429       | -413 | -407 |
| X  | X  |   |    | -440       | -422 | -415 |
| X  |    | X |    | -452       | -434 | -427 |
| X  |    |   | X  | -437       | -419 | -412 |
| X  | X  | X |    | -452       | -433 | -425 |
| X  |    | X | X  | -452       | -432 | -424 |

**Table A3.3.5** Best final estimates for the 2-compartments model for R-ketamine including IIV for Cl and V1, and IOV for Cl and Q, without covariate effect, and a constant error model.

| VALUE                                    |       | STOCH. APPROX. |           |         |
|------------------------------------------|-------|----------------|-----------|---------|
|                                          |       | S.E.           | R.S.E.(%) |         |
| Fixed Effects                            |       |                |           |         |
| Cl_pop                                   | 0.2   | 0.024          | 11.6      |         |
| V1_pop                                   | 1.58  | 0.19           | 11.7      |         |
| Q_pop                                    | 0.19  | 0.065          | 34.4      |         |
| V2_pop                                   | 4.91  | 0.74           | 15.1      |         |
| Standard Deviation of the Random Effects |       |                |           |         |
|                                          | Value | C.V.(%)        |           |         |
| omega_Cl                                 | 0.011 | 1.15           | 0.15      | 1.35e+3 |
| omega_V1                                 | 0.064 | 6.42           | 0.26      | 412     |
| gamma_Cl                                 | 0.41  | 43.03          | 0.08      | 19.5    |
| gamma_Q                                  | 1.14  | 164.52         | 0.32      | 27.8    |



| VALUE                  | STOCH. APPROX. |           |      |
|------------------------|----------------|-----------|------|
|                        | S.E.           | R.S.E.(%) |      |
| Error Model Parameters |                |           |      |
| a                      | 0.23           | 0.023     | 9.83 |

Due to observed correlations and several inappropriate RSE%, IIV is then removed stepwise.

**Table A3.3.6** Diagnostic values for models including different IIV contributions.

| CI | V1 | Q | V2 | -2LL (OFV) | AIC  | BIC  | R.S.E.(%) > 50           |
|----|----|---|----|------------|------|------|--------------------------|
|    |    |   |    | -452       | -438 | -433 |                          |
| X  |    |   |    | -452       | -436 | -430 | $\omega$ CI              |
|    | X  |   |    | -452       | -436 | -430 | $\omega$ V1              |
|    |    | X |    | -452       | -436 | -430 | $\omega$ Q               |
| X  | X  |   |    | -452       | -434 | -427 | $\omega$ CI, $\omega$ V1 |

The model detects a correlation between CI and Q for IOV:

| -2LL (OFV) | AIC  | BIC  | R.S.E.(%) > 50 |
|------------|------|------|----------------|
| -458       | -442 | -436 |                |

**Table A3.3.7** Diagnostic results with a covariate effect (Body Weight of the individuals).

| Criteria | No covariate | Weight |
|----------|--------------|--------|
| CI       | 21.16        | 22.68  |
| Q        | 49.11        | 51.86  |

In the final best model no IIV remains to explain parameters variability, only IOV for CI and Q, including no covariate (Weight) effect, and a correlation between CI and Q IOV.

**Table A3.3.8** Validation of the error model for the final model.

| Error Model  |                                              | OFV  | AIC  | BIC  | Comment                           |
|--------------|----------------------------------------------|------|------|------|-----------------------------------|
| Constant     | $Cc + a \cdot e$                             | -458 | -442 | -436 |                                   |
| Proportional | $Cc + b \cdot Cc \cdot e$                    | -448 | -432 | -426 | $b_{R.S.E.} < 10\%$               |
| Combined_1   | $Cc + (a + b \cdot Cc) \cdot e$              | -458 | -440 | -433 | $b_{R.S.E.} > 50\%$               |
| Combined_2   | $Cc + \sqrt{(a^2 + (b \cdot cC)^2)} \cdot e$ | -458 | -440 | -433 | $a_{R.S.E.} \& b_{R.S.E.} > 50\%$ |

**Table A3.3.9** Shapiro Wilk tests for normal distribution of random effects for the final model.

|        | STATISTICS | P-VALUE |
|--------|------------|---------|
| eta_Cl | 0.95       | 6.89e-1 |
| eta_Q  | 0.94       | 7.3e-1  |

**Table A3.3.10** Shapiro Wilk tests for normal distribution of individual parameters for the final model.

|    | DISTRIBUTION | STATISTICS | P-VALUE |
|----|--------------|------------|---------|
| Cl | lognormal    | 0.95       | 6.89e-1 |
| Q  | lognormal    | 0.94       | 7.3e-1  |

**Table A3.3.11** Shapiro Wilk tests for normal distribution of residuals for the final model.

|       | STATISTICS | P-VALUE |
|-------|------------|---------|
| IWRES | 0.98       | 3.53e-1 |
| PWRES | 0.98       | 2.66e-1 |
| NPDE  | 0.99       | 6.3e-1  |

**Table A3.3.12** Symmetry test around 0 for residuals for the final model

|       | STATISTICS | P-VALUE |
|-------|------------|---------|
| IWRES | 0.62       | 5.34e-1 |
| PWRES | -1.14      | 2.56e-1 |
| NPDE  | -1.32      | 1.88e-1 |

**Table A3.3.13** Best final estimates of the pharmacokinetic parameters of R-Ketamine with the final model including a constant error model, no IIV, no covariate effect (weight), and IOV for Cl and Q including correlation.

| VALUE                                    |       | STOCH. APPROX. |           |      |
|------------------------------------------|-------|----------------|-----------|------|
|                                          |       | S.E.           | R.S.E.(%) |      |
| Fixed Effects                            |       |                |           |      |
| Cl_pop                                   | 0.2   | 0.024          | 11.6      |      |
| V1_pop                                   | 1.52  | 0.15           | 10.2      |      |
| Q_pop                                    | 0.19  | 0.059          | 30.9      |      |
| V2_pop                                   | 4.67  | 0.64           | 13.7      |      |
| Standard Deviation of the Random Effects |       |                |           |      |
|                                          | Value | C.V.(%)        |           |      |
| gamma_Cl                                 | 0.43  | 44.82          | 0.082     | 19.2 |
| gamma_Q                                  | 1.05  | 142.83         | 0.25      | 23.4 |
| Correlations                             |       |                |           |      |
| corr2_Q_Cl                               | 0.64  | 0.19           | 29.9      |      |
| Error Model Parameters                   |       |                |           |      |
| a                                        | 0.24  | 0.023          | 9.69      |      |

**Figure A3.3.1** Observed vs. predicted concentrations for R-Ketamine.

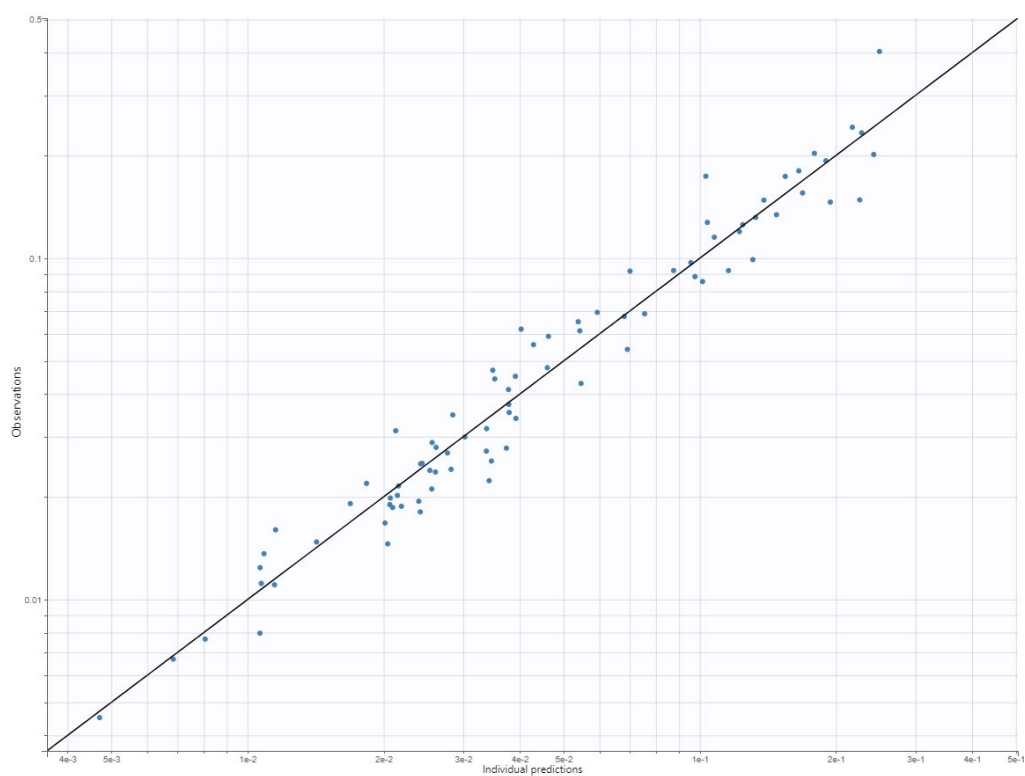

**Figure A3.3.2** Distribution of the residuals.

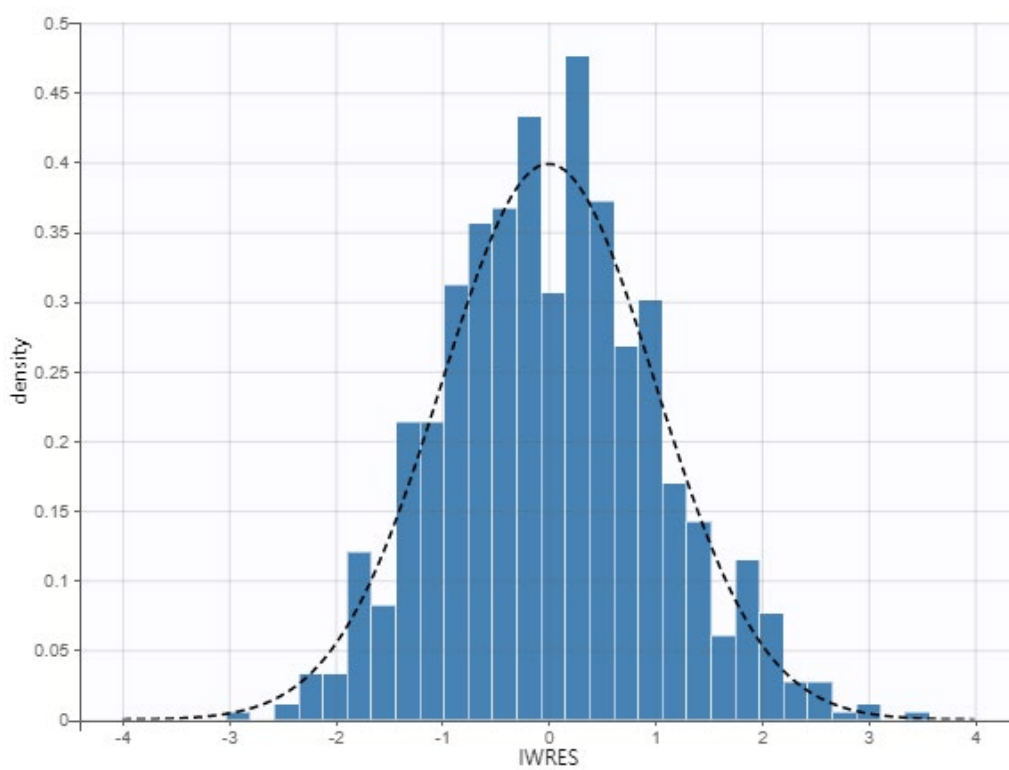

**Figure A3.3.3** Visual predictive check of the final model.

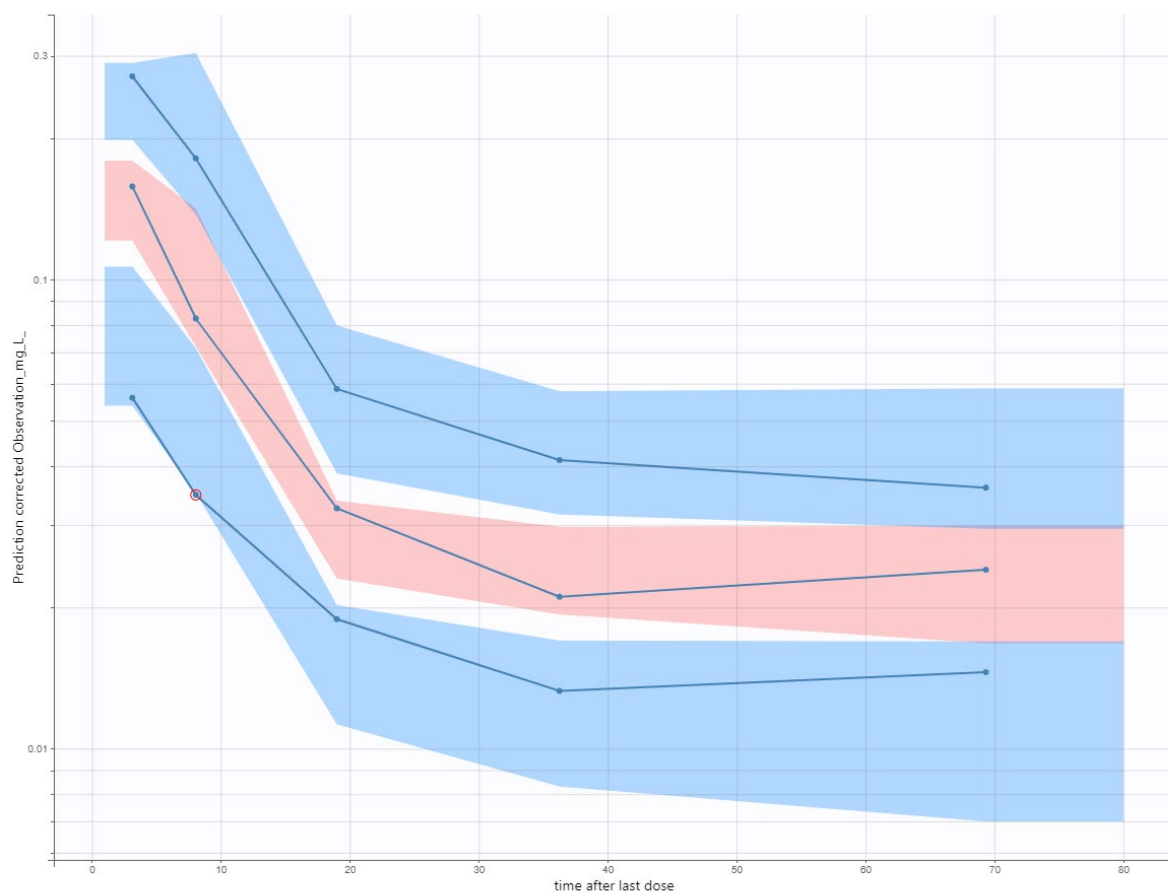

## 4. Modelling for R-Ketamine and R-Norketamine:

### 4.1. Individual compartmental analysis:

Model applied: Intravenous infusion administration, no delay, no first pass effect, unidirectional Parent-metabolite conversion, mammillary 2 compartments model with linear elimination for S-Ketamine (Parent), Linear elimination for S-Norketamine, BLQ=LOQ/2.

First run with **Optimization Cost function:**  $(Y_{\text{pred}} - Y_{\text{obs}})^2 / Y_{\text{pred}}^2$

**Table A4.1.1** Diagnostic values with different compartment models.

| <i>Model</i> | Metabolite from Parent Comp 1 |               |               | Metabolite from Parent Comp 2 |               |
|--------------|-------------------------------|---------------|---------------|-------------------------------|---------------|
|              | <b>1-Comp</b>                 | <b>2-Comp</b> | <b>3-Comp</b> | <b>1-Comp</b>                 | <b>2-Comp</b> |
| -2LL (OFV)   | -1206                         | -1184         | -1178         | -1143                         | -1192         |
| AIC          | -1012                         | -926          | -856          | -949                          | -934          |
| BIC          | -977                          | -880          | -799          | -913                          | -888          |

Conclusion: The One-compartment-metabolite model issued from the first Parent-compartment was retained.

Definition:  $Y = (Y_{\text{pred}} - Y_{\text{obs}})$

**Table A4.1.2** Total cost and diagnostic values with different cost functions.

| <i>Cost function</i> | $Y^2$ | $Y^2 / Y_{\text{obs}}$ | $Y^2 / Y_{\text{pred}}$ | $Y^2 / Y_{\text{obs}}^2$ | $Y^2 / Y_{\text{pred}}^2$ | $Y^2 /  Y_{\text{pred}} \cdot Y_{\text{obs}} $ |
|----------------------|-------|------------------------|-------------------------|--------------------------|---------------------------|------------------------------------------------|
| Cost                 | 0.01  | 0.18                   | 0.18                    | 6.73                     | 6.31                      | 6.93                                           |
| -2LL (OFV)           | -1196 | -1241                  | -1239                   | -1217                    | -1206                     | -1211                                          |
| AIC                  | -1002 | -1047                  | -1045                   | -1023                    | -1012                     | -1017                                          |
| BIC                  | -966  | -1012                  | -1010                   | -988                     | -977                      | -982                                           |

Conclusion: The Cost function  $Y^2 / Y_{\text{obs}}$  is retained.

**Table A4.1.3** Confirmation of the best compartment model for S-Norketamine.

| <i>Model</i> | <b>1-Comp</b> | <b>2-Comp</b> | <b>3-Comp</b> |
|--------------|---------------|---------------|---------------|
| -2LL (OFV)   | -1261         | -1200         | -1160         |
| AIC          | -1067         | -942          | -838          |
| BIC          | -1032         | -896          | -781          |

Conclusion: The One-compartmental model is further retained.

**Figure A4.1.1** Observed vs. predicted concentrations with the final model (Two-compartment for S-Ketamine, One compartment issued from the central parent compartment for S-Norketamine).

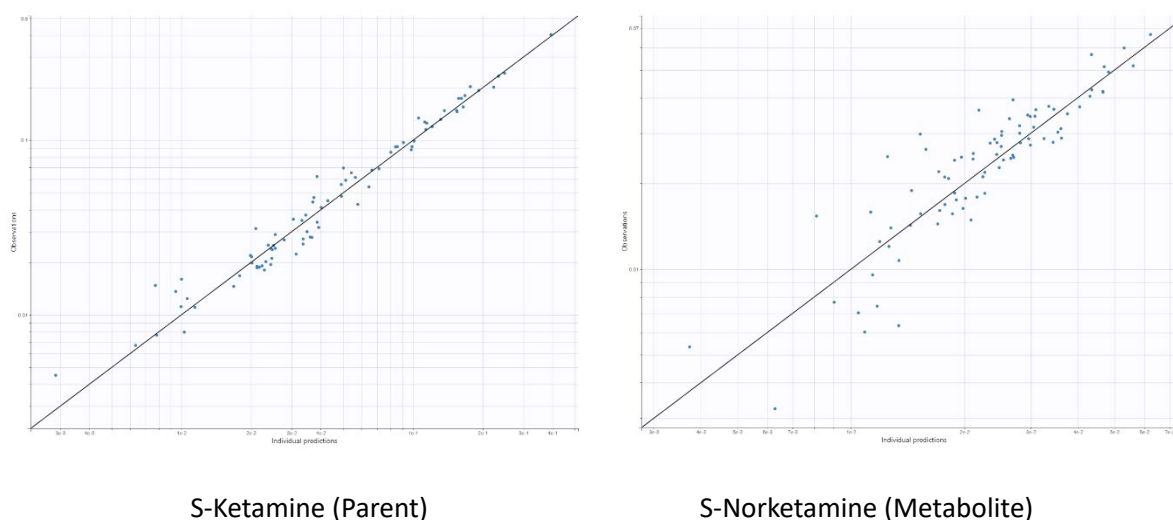

**Table A4.1.4** Best final estimates of the Parent-Metabolite model: Standard mammillary 2- Compartments model for S-Ketamine (Parent), and a standard mammillary 1-Compartment model for S-Norketamine (Metabolite), issued from the first Parent compartment.

|     | Q1      | median | Q3    | mean  | SD    | SE     | CV (%) | GeoMean |
|-----|---------|--------|-------|-------|-------|--------|--------|---------|
| V1  | 0.12    | 0.7    | 1.18  | 0.83  | 0.76  | 0.19   | 91.08  | 0.22    |
| Cl  | 0.13    | 0.19   | 0.22  | 0.17  | 0.063 | 0.016  | 36.88  | 0.16    |
| Q   | 0.17    | 0.32   | 0.95  | 0.83  | 1.32  | 0.33   | 158.88 | 0.27    |
| V2  | 1.82    | 3      | 4.5   | 3.14  | 1.6   | 0.4    | 51.03  | 2.67    |
| Clm | 0.00092 | 0.04   | 0.1   | 0.074 | 0.11  | 0.028  | 151.23 | 0.012   |
| Kpm | 0.03    | 0.048  | 0.086 | 0.056 | 0.034 | 0.0084 | 60.15  | 0.047   |

#### 4.2. Population compartmental analysis:

**Model applied:** Intravenous infusion administration, no delay, no first pass effect, Parent-Metabolite mammillary compartments model, Parent (S-Ketamine) is modeled as a 2-compartment model, linear elimination, Metabolite (S-Norketamine) ) is modeled as a 1-compartment model issued from the main parent compartment, linear elimination. BLQ=LOQ/2. Concentrations are modeled with a lognormal distribution. Parameters are modeled by Stochastic Approximation Expectation-Maximization (SAEM) algorithm (Monolix©).

**Main settings:** Burn-in phase with 50 iterations. Exploratory phase with 250-5000 iterations (auto-stop criteria), stepsize exponent=0, enabled simulated annealing with a decreasing rate of 0.95. Smoothing phase with 100-1000 iterations (auto-stop criteria), stepsize exponent=0.7. Conditional mode with maximal 1000 iterations, tolerance at 0.000001. Stochastic approximation with 100-500 iterations. Monte Carlo size of 10000, with optimized degrees of freedom (1 to 15). Initial estimates are adjusted, and a final run is repeated using the last final estimates.

**Table A4.2.1** Diagnostic results with a constant error model on predicted concentration (  $C_p = C_c + a.e$  ) for both parent and metabolite concentrations. Based on the preliminary results, the model includes first IOV for Cl and Q for the parent model.

| IIV |     | IOV |     |            |      |      |
|-----|-----|-----|-----|------------|------|------|
| Clm | Kpm | Clm | Kpm | -2LL (OFV) | AIC  | BIC  |
|     |     |     |     | -993       | -971 | -963 |
| X   |     |     |     | -995       | -971 | -962 |
|     | X   |     |     | -1004      | -980 | -971 |
|     |     | X   |     | -997       | -973 | -963 |
|     |     |     | X   | -1006      | -982 | -973 |
|     | X   |     | X   | -1007      | -981 | -971 |
|     |     | X   | X   | -1007      | -981 | -971 |

Conclusion: The model with IOV on Kpm is retained

**Table A4.2.2** Diagnostic results with different error models (OFV / AIC / BIC, all values are negatives).

| Parent/Metabolite | Constant     | Proportional | Combined_1   | Combined_2   |
|-------------------|--------------|--------------|--------------|--------------|
| Constant          | 1006/982/973 | 1018/994/984 | 1017/991/981 | 1017/991/981 |

**Table A4.2.3** Diagnostic values to compare the use of Covariate Body weight (kg) on the model parameters (OFV / AIC / BIC, all values are negatives).

|     |              |
|-----|--------------|
| -   | 1006/982/973 |
| Kpm | 1020/995/985 |

#### Final model equations:

$$\log(V1) = \log(V1\_pop)$$

$$\log(Cl) = \log(Cl\_pop) + \gamma_{Cl}$$

$$\log(Q) = \log(Q\_pop) + \gamma_Q$$

$$\log(V2) = \log(V2\_pop)$$

$$\log(Cl_m) = \log(Cl\_pop)$$

$$\log(Kpm) = \log(Kpm\_pop) + \beta_{Kpm\_Weight} * Weight + \gamma_{Kpm}$$



**Table A4.2.4** Best estimates for the Parent-metabolite model for R-Ketamine and R-Norketamine with Constant and Proportional error models on R-Ketamine (Parent) and R-Norketamine (metabolite), respectively, no IIV, IOV on Cl, Q, and Kpm, and a covariate effect of Weight on Kpm, correlation between Cl and Q.

| VALUE                                    |           | STOCH. APPROX. |           |       |      |
|------------------------------------------|-----------|----------------|-----------|-------|------|
|                                          |           | S.E.           | R.S.E.(%) |       |      |
| Fixed Effects                            |           |                |           |       |      |
| V1_pop                                   | 1.52      | 0.13           | 8.31      |       |      |
| Cl_pop                                   | 0.11      | 0.019          | 16.8      |       |      |
| Q_pop                                    | 0.16      | 0.043          | 26.4      |       |      |
| V2_pop                                   | 4.14      | 0.69           | 16.8      |       |      |
| Clm_pop                                  | 0.091     | 0.014          | 15.4      |       |      |
| Kpm_pop                                  | 0.016     | 0.0083         | 50.4      |       |      |
| beta_Kpm_Weight_kg_                      | 0.11      | 0.053          | 49.6      |       |      |
| Standard Deviation of the Random Effects |           |                |           |       |      |
|                                          | Value     | C.V.(%)        |           |       |      |
|                                          | gamma_Cl  | 0.46           | 49.11     | 0.1   | 22.4 |
|                                          | gamma_Q   | 0.92           | 114.92    | 0.21  | 23.3 |
|                                          | gamma_Kpm | 0.25           | 25.67     | 0.084 | 33.3 |
| Correlations                             |           |                |           |       |      |
| corr2_Q_Cl                               | 0.61      | 0.21           | 35.0      |       |      |
| Error Model Parameters                   |           |                |           |       |      |
| a1                                       | 0.22      | 0.022          | 10.2      |       |      |
| b2                                       | 0.097     | 0.0089         | 9.15      |       |      |

**Figure A4.2.1** Observed versus predicted concentrations of R-Ketamine.

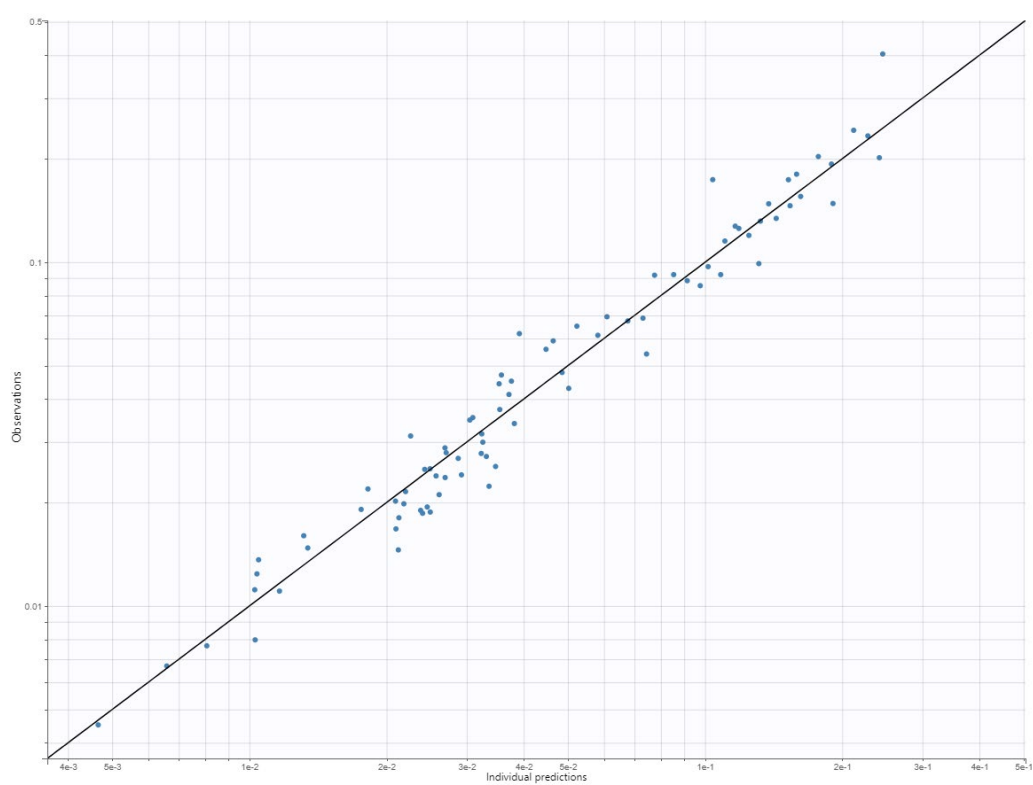

**Figure A4.2.2** Residual distribution for R-Ketamine.

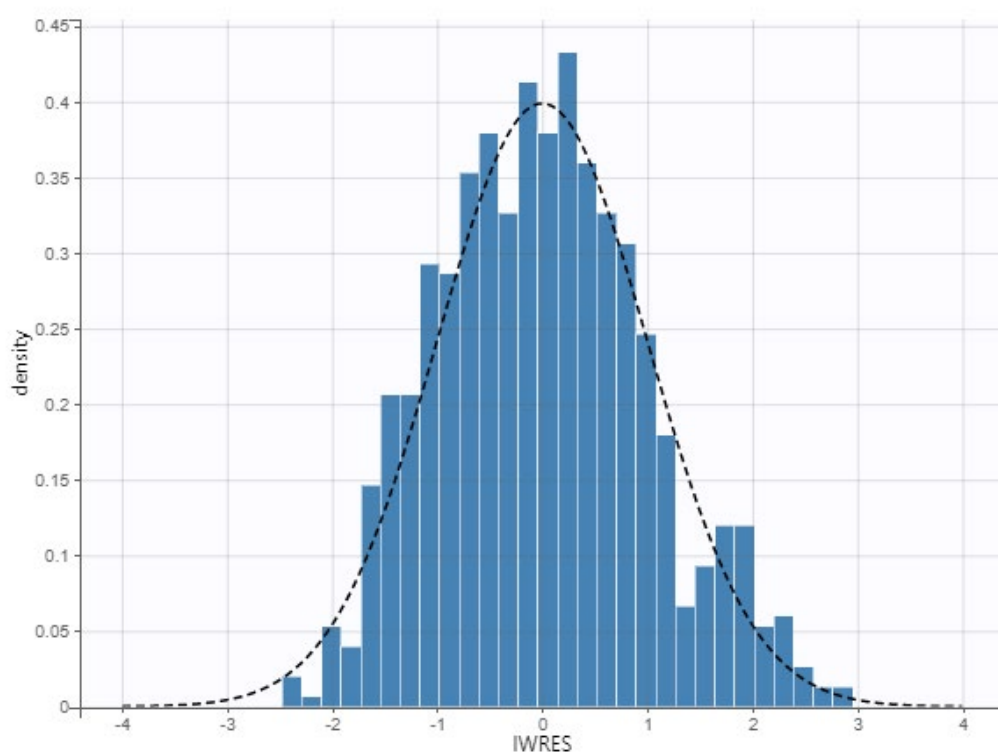

**Figure A4.2.3** Visual predictive check for S-Ketamine.

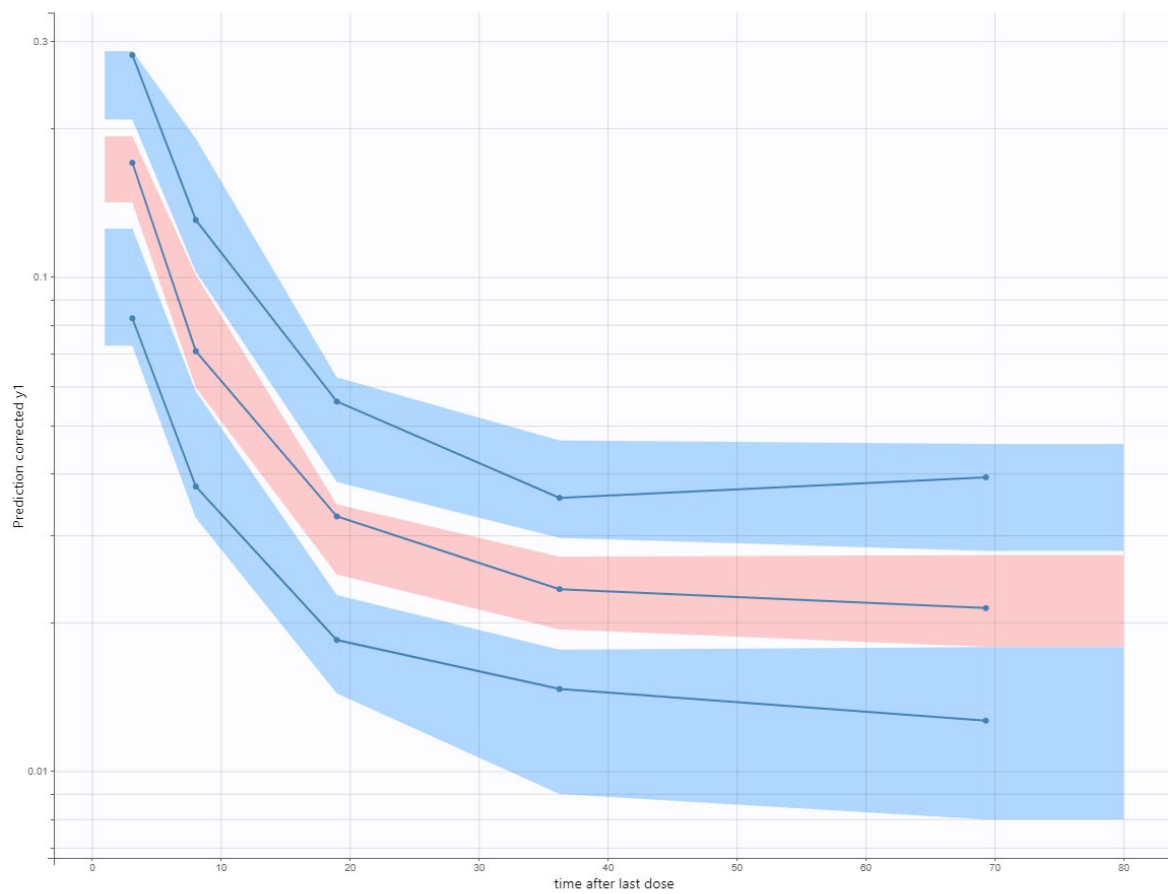

**Figure A4.2.4** Observed versus predicted concentrations of R-Norketamine.

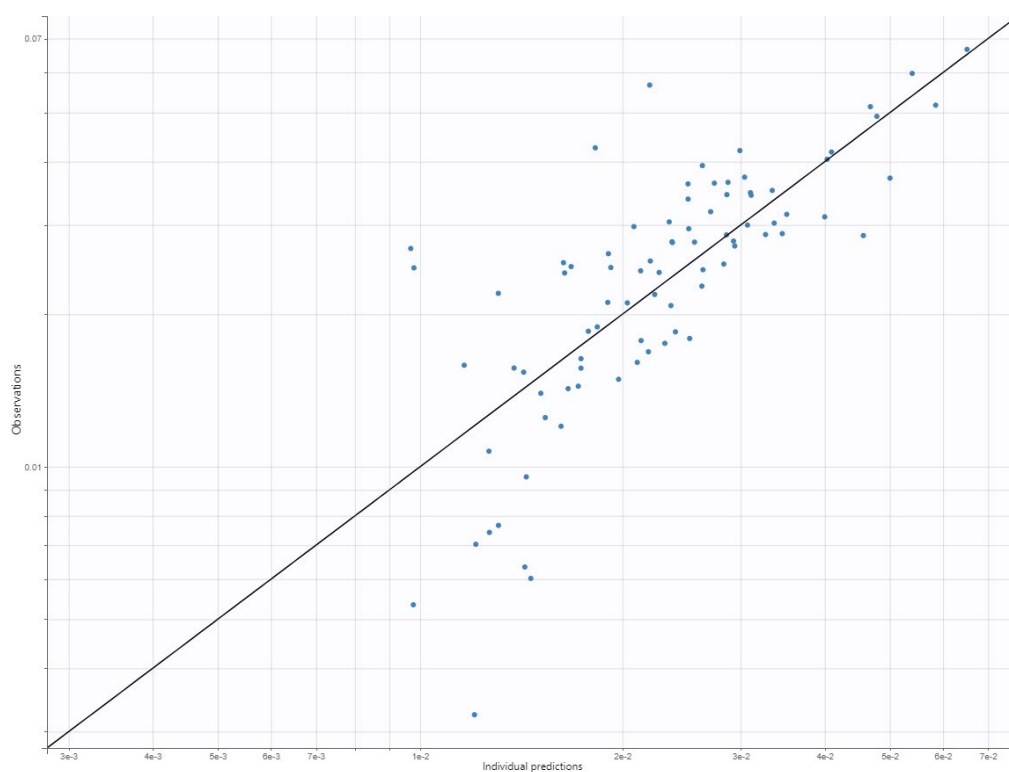

**Figure A4.2.5** Residual distribution for R-Norketamine

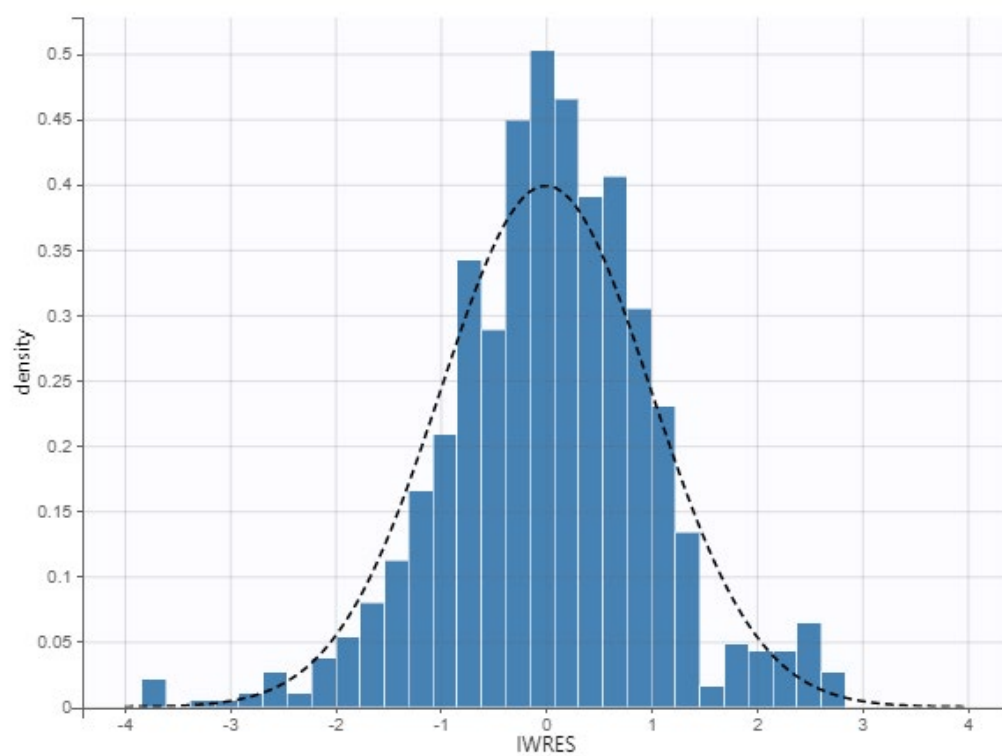

**Figure A4.2.6** Visual predictive check for R-Norketamine.

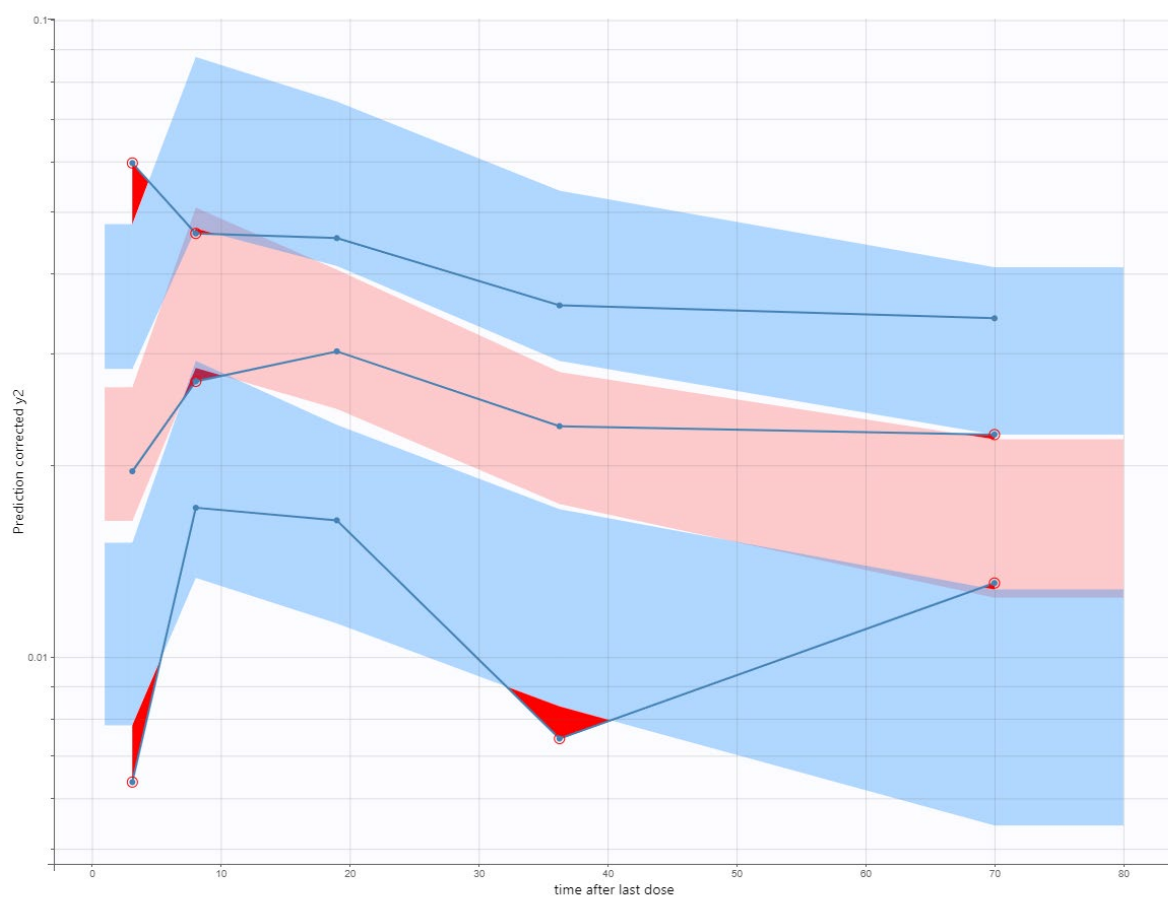

## 5. Prediction S-ketamine:

Based on the final Population Parent-metabolite model obtained for S-ketamine, a prediction is performed with administration of 0.5 mg/kg IV racemic ketamine over 1 minute, followed by 2 mg/kg/h for 60 minutes, reduced to 1.8 mg/kg/h for further 60 minutes.

**Figure A5.1** Prediction for S-Ketamine plasma concentration over time (minute) showing median and 5-95% confidence interval divided in 6 areas (5-20%, 20-35%, 35-50%, 50-65%, 65-80%, 80-95%).

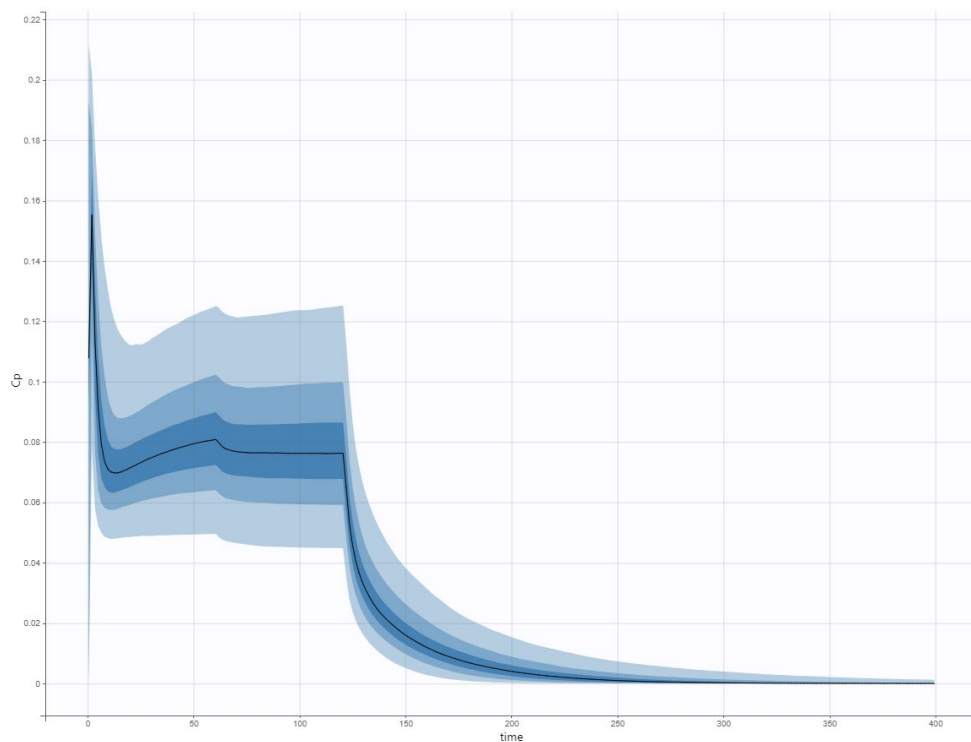

**Figure A5.1** Prediction for S-Norketamine plasma concentration over time showing median and 5-95% confidence interval divided in 6 areas (5-20%, 20-35%, 35-50%, 50-65%, 65-80%, 80-95%).

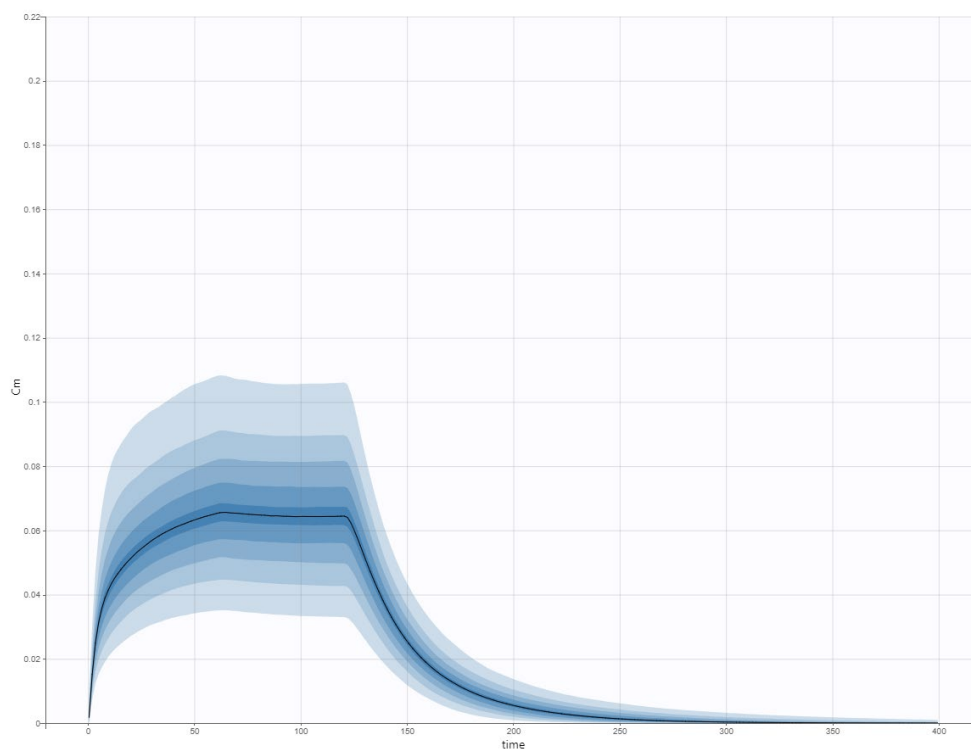

Supplement: Supplementary file 1 [file supplementary]
